# Supplementary material for: Discovery of a novel benzimidazole conjugated quinazolinone derivative as a promising SARS-CoV-2 3CL protease inhibitor
Source: PubMed Central journal article supplement — RSC Adv. 2024 Oct 24;14(46):33820–9. doi: 10.1039/d4ra03267e (PMC11500731; doi:10.1039/d4ra03267e), 2024-10-24
Supplement: RA-014-D4RA03267E-s001.pdf [file RA-014-D4RA03267E-s001.pdf]

## SUPPORTING INFORMATION

### Discovery of a novel benzimidazole conjugated quinazolinone derivative as promising SARS-CoV-2 3CL protease inhibitor†

Bui Thi Buu Hue,<sup>\*a</sup> Huynh Nguyet Huong Giang,<sup>b</sup> Cuong Quoc Nguyen,<sup>a</sup> Feng-Pai Chou,<sup>bd</sup> Danh La Duc Thanh,<sup>ac</sup> Quang De Tran,<sup>a</sup> Vo Trung Hieu,<sup>a</sup> Lam Hoang Phuong Mai,<sup>a</sup> Hong-Cheu Lin,<sup>\*cd</sup> and Tung-Kung Wu<sup>\*bd</sup>

<sup>a</sup> Department of Chemistry, College of Natural Sciences, Can Tho University, Can Tho City 94000, Vietnam

<sup>b</sup> Department of Biological Science and Technology, National Yang Ming Chiao Tung University, Hsinchu 30010, Taiwan

<sup>c</sup> Department of Material Science, National Yang Ming Chiao Tung University, 1001 Ta-Hsueh Rd., Hsinchu 30010, Taiwan

<sup>d</sup> Center for Emergent Functional Matter Science, National Yang Ming Chiao Tung University, 1001 Ta-Hsueh Rd., Hsinchu 30010, Taiwan.

\* Correspondence:

btbhue@ctu.edu.vn (B.T.B.H.)

linhc@nycu.edu.tw (H.-C.L.)

tkwmll@nycu.edu.tw (T.-K.W.)

|                                                                              |    |
|------------------------------------------------------------------------------|----|
| <b>S1. Chemical syntheses</b> .....                                          | 2  |
| <b>S2. Spectrometry data</b> .....                                           | 8  |
| <b>S3. Molecular cloning and protein expression of M<sup>pro</sup></b> ..... | 33 |
| <b>S4. <i>In vitro</i> inhibitory activity assay of 3CL protease</b> .....   | 33 |
| <b>S5. Theoretical studies</b> .....                                         | 34 |

## S1. Chemical syntheses

All reagents were purchased from commercial sources and used without further purification. Reactions were monitored by thin-layer chromatography (TLC) on 0.2 mm precoated silica gel 60 F254 plates (Merck), and compounds were visualized on TLC with UV light. The derivatives were synthesized and then purified by flash column chromatography using silica gel 45–63  $\mu\text{m}$  (230–400 mesh) and 60 pore size. The NMR spectra were obtained from a Varian 300 MHz or Bruker 400 MHz spectrometer. The chemical shifts ( $\delta$ ) were reported in parts per million (ppm) relative to tetramethylsilane (TMS) or the internal solvent signal of deuterated solvents. Multiplicities were indicated by *s* (singlet), *d* (doublet), *t* (triplet), and *m* (multiplet).

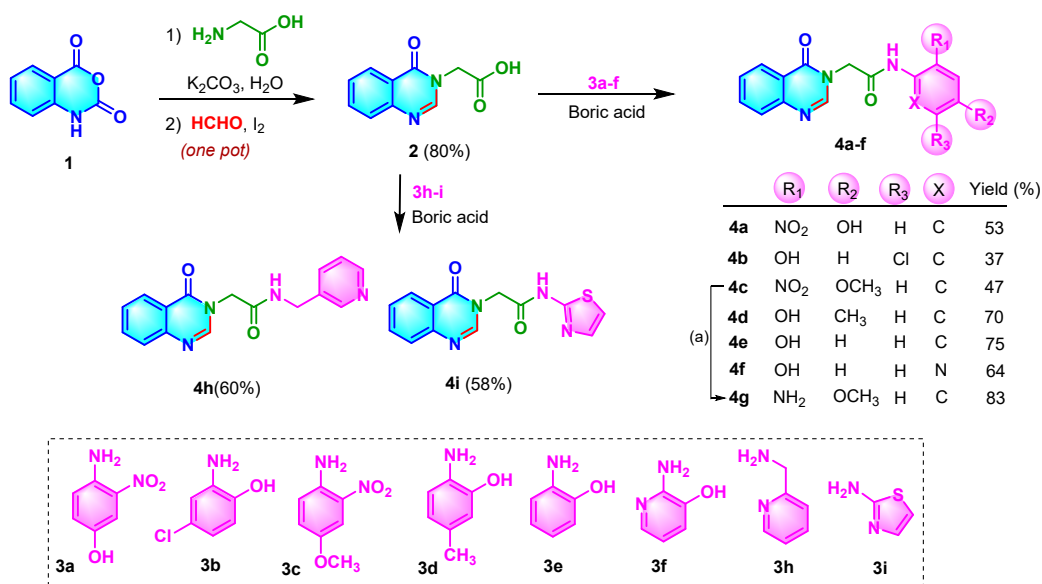

Scheme S1. Synthesis of compounds 4a-i

### Synthetic procedure of compound (2)

A mixture of isatoic anhydride **1** (163.1 mg, 1 mmol), glycine (82.5 mg, 1.1 mmol), and  $\text{K}_2\text{CO}_3$  (304.0 mg, 2.2 mmol) in  $\text{H}_2\text{O}$  (5 mL) was stirred at room temperature for 30 minutes then formaldehyde (120.1 mg, 4 mmol),  $\text{I}_2$  (381.0 mg, 1.5 mmol), and KI (23.0 mg, 0.15 mmol) were added. The resulting mixture was refluxed at  $100^\circ\text{C}$  for 5h. The reaction mixture was quenched by saturated aqueous solution of  $\text{Na}_2\text{S}_2\text{O}_3$  (5 mL), neutralized by aqueous solution of 10% HCl to pH  $\sim$ 3. The aqueous layer was extracted with ethyl acetate, EtOAc ( $3 \times 10$  mL). The combined organic layers were washed with saturated aqueous solution of NaCl (30 mL), dried over  $\text{Na}_2\text{SO}_4$ , filtered and the solvent was evaporated under reduced pressure to obtain the crude product (**2**) which was used for the next step without any further purification (132.6 mg, 80%).  $R_f = 0.15$  (EtOAc:MeOH: AcOH= 65:30:5).

### Synthetic procedure of compounds 4a-f

A mixture of (2) (0.5 mmol) and boric acid (0.1 mmol) in toluene (5 mL) was stirred at room temperature for 30 minutes and then amines (3a-f) (0.5 mmol) was added. The resulting mixture was refluxed at 120°C for 12h. At the end of the reaction, solvent was evaporated under reduced pressure. Column chromatography of the crude product provided the desired 4a-f.

### Synthetic procedure of compound 4g

To a mixture of compound 4c (0.15 mmol) in methanol (5 mL) was added CH<sub>3</sub>COONH<sub>4</sub> (0.75 mmol) and Zn (0.75 mmol). The resulting mixture was stirred at room temperature for 20 minutes. The reaction mixture was then filtered and the excess of methanol was evaporated under reduced pressure. The residue was dissolved in water (10 mL) and the water phase was extracted with EtOAc (3×30 mL). The combined organic layers were washed with aqueous saturated solution of NaCl (30 mL), dried over Na<sub>2</sub>SO<sub>4</sub>, filtered and solvent was evaporated under reduced pressure. Column chromatography of the crude product afforded the desired compound 4g as a white solid (40.3 mg - 83%), R<sub>f</sub> = 0.42 (Hex:EtOAc = 1:4).

**N-(4-Hydroxy-2-nitrophenyl)-2-(4-oxoquinazolin-3(4H)-yl)acetamide (4a):** Yield 42% as yellow solid. R<sub>f</sub> = 0.30 (Hex:EtOAc = 1:2). Mp 297-299°C. FT-IR (KBr)  $\nu_{\max}$  (cm<sup>-1</sup>): 3285, 1655, 1683, 1615, 1557, 1540, 1521, 1360, 1292, 1280, 1234, 1217, 1168, 969, 777. HR-ESI-MS found *m/z* 339.0731 [M-H]<sup>-</sup> (calcd. 339.0729, C<sub>16</sub>H<sub>12</sub>N<sub>4</sub>O<sub>5</sub>). <sup>1</sup>H-NMR (500 MHz, DMSO-*d*<sub>6</sub>,  $\delta$  ppm): 10.37 (*s*, 1H), 8.32 (*s*, 1H), 8.15 (*dd*, *J*<sub>1</sub> = 7.5, *J*<sub>2</sub> = 1.0, 1H), 7.85 (*m*, 1H), 7.71 (*d*, *J* = 8.0, 1H), 7.57 (*t*, *J* = 7.7, 1H), 7.43 (*d*, *J* = 8.5, 1H), 7.30 (*d*, *J* = 3.0, 1H), 7.12 (*dd*, *J*<sub>1</sub> = 9.0, *J*<sub>2</sub> = 3.0, 1H), 4.87 (*s*, 2H). <sup>13</sup>C-NMR (125MHz, DMSO-*d*<sub>6</sub>,  $\delta$  ppm): 165.9, 160.1, 155.0, 148.3, 148.0, 134.5, 127.2, 127.1, 126, 121.8, 121.4, 121.1, 110.6, 48.3.

**N-(5-Chloro-2-hydroxyphenyl)-2-(4-oxoquinazolin-3(4H)-yl)acetamide (4b):** Yield 37% as white solid. R<sub>f</sub> = 0.23 (Hex:EtOAc = 1:1). Mp 284-286°C. FT-IR (KBr)  $\nu_{\max}$  (cm<sup>-1</sup>): 3247, 3222, 3049, 2957, 2923, 2854, 1694, 1673, 1614, 1544, 1477, 1408, 1373, 1293, 1171, 1118, 969, 917, 892, 813, 774. HR-ESI-MS found *m/z* 330.0643 [M+H]<sup>+</sup> (calcd. 330.0645, C<sub>16</sub>H<sub>12</sub>ClN<sub>3</sub>O<sub>3</sub>). <sup>1</sup>H-NMR (500 MHz, DMSO-*d*<sub>6</sub>,  $\delta$  ppm): 10.28 (*s*, 1H), 9.86 (*s*, 1H), 8.35 (*s*, 1H), 8.15 (*dd*, *J*<sub>1</sub> = 8.0, *J*<sub>2</sub> = 1.5, 1H), 7.98 (*d*, *J* = 2.5 Hz, 1H), 7.89-7.84 (*m*, 1H), 7.72 (*d*, *J* = 7.5, 1H), 7.59-7.55 (*m*, 1H), 6.97 (*dd*, *J*<sub>1</sub> = 8.5, *J*<sub>2</sub> = 2.5, 1H), 6.90 (*d*, *J* = 8.5, 1H), 4.97 (*s*, 2H). <sup>13</sup>C-NMR (125 MHz, DMSO-*d*<sub>6</sub>,  $\delta$  ppm): 166.0, 160.22, 148.5, 148.0, 146.2, 134.4, 127.2, 127.0, 125.9, 123.7, 122.0, 121.4, 120.8, 116.2, 48.7.

**N-(4-methoxy-2-nitrophenyl)-2-(4-oxoquinazolin-3(4H)-yl)acetamide (4c):** Yield 38% as yellow solid. R<sub>f</sub> = 0.31 (Hex:EtOAc = 1:1). Mp 215-217°C. FT-IR (KBr)  $\nu_{\max}$  (cm<sup>-1</sup>): 3313, 3001, 2944, 1678, 1613, 1588, 1466, 1365, 1307, 1280, 1253, 777. HR-ESI-MS found *m/z* 353.0611 [M-H]<sup>-</sup> (calcd. 353.0886,

C<sub>17</sub>H<sub>15</sub>N<sub>4</sub>O<sub>5</sub>). <sup>1</sup>H-NMR (500 MHz, DMSO-*d*<sub>6</sub>, δ ppm): 10.43 (*s*, 1H), 8.33 (*s*, 1H), 8.16 (*dd*, *J*<sub>1</sub> = 1.5, *J*<sub>2</sub> = 9.5, 1H), 7.87-7.84 (*m*, 1H), 7.71 (*d*, *J* = 8.5, 1H), 7.58-7.55 (*m*, 2H), 7.49 (*d*, *J* = 3.0, 1H), 7.31 (*dd*, *J*<sub>1</sub> = 9.0, *J*<sub>2</sub> = 3.0, 1H), 4.89 (*s*, 2H), 3.84 (*s*, 3H). <sup>13</sup>C-NMR (125 MHz, DMSO-*d*<sub>6</sub>, δ ppm): 166.0, 160.1, 156.4, 148.3, 147.9, 143.4, 134.5, 127.5, 127.2, 127.1, 126.0, 123.2, 121.4, 120.2, 109.1, 56.0, 48.3.

***N*-(2-Hydroxy-4-methylphenyl)-2-(4-oxoquinazolin-3(4*H*)-yl)acetamide (4d)**: Yield 38% as white solid. *R*<sub>f</sub> = 0.36 (Hex:EtOAc = 1:2). Mp 242-244°C. FT-IR (KBr) *v*<sub>max</sub> (cm<sup>-1</sup>): 3250, 3228, 3054, 1698, 1687, 1670, 1614, 1549, 1519, 1478, 1375, 1322, 1294, 1204, 1172, 1120, 968, 774. HR-ESI-MS found *m/z* 310.1194 [M-H]<sup>-</sup> (calcd. 310.1192, C<sub>17</sub>H<sub>15</sub>N<sub>3</sub>O<sub>3</sub>). <sup>1</sup>H-NMR (500 MHz, DMSO-*d*<sub>6</sub>, δ ppm): 9.64 (*s*, 1H), 9.57 (*s*, 1H), 8.35 (*s*, 1H), 8.15 (*dd*, *J*<sub>1</sub> = 7.5, *J*<sub>2</sub> = 1.0, 1H), 7.87-7.84 (*m*, 1H), 7.71 (*d*, *J* = 8.0, 1H), 7.64 (*s*, 1H), 7.58-7.55 (*m*, 1H), 6.73-6.78 (*m*, 2H), 4.94 (*s*, 2H), 3.31 (*s*, 3H). <sup>13</sup>C-NMR (125 MHz, DMSO-*d*<sub>6</sub>, δ ppm): 165.5, 160.2, 148.6, 148.1, 145.3, 134.4, 127.4, 127.2, 127.0, 126.0, 125.5, 124.9, 122.5, 121.4, 115.1, 48.7, 20.3.

***N*-(2-Hydroxyphenyl)-2-(4-oxoquinazolin-3(4*H*)-yl)acetamide (4e)**: Yield 76% as white solid. *R*<sub>f</sub> = 0.15 (Hex:EtOAc = 1:1). FT-IR (KBr) *v*<sub>max</sub> (cm<sup>-1</sup>): 3264, 3061, 1697, 1677, 1617, 1541, 1476, 1455, 1374, 1300, 1258, 1222, 965, 756. ESI-MS found *m/z* 295.9 [M+H]<sup>+</sup> (calcd. 296.1, C<sub>16</sub>H<sub>14</sub>N<sub>4</sub>O<sub>2</sub>) and *m/z* 293.8 [M+H]<sup>+</sup> (calcd. 294.1, C<sub>16</sub>H<sub>13</sub>N<sub>3</sub>O<sub>3</sub>). <sup>1</sup>H-NMR (500 MHz, DMSO-*d*<sub>6</sub>, δ ppm): 9.83 (*s*, 1H), 9.69 (*s*, 1H), 8.36 (*s*, 1H), 8.16 (*d*, *J* = 8.0, 1H), 7.87-7.80 (*m*, 2H), 7.71 (*d*, *J* = 8.0, 1H), 7.58-7.55 (*m*, 1H), 6.95-6.92 (*m*, 1H), 6.90-6.88 (*m*, 1H), 6.76-6.73 (*m*, 1H), 4.96 (*s*, 2H). <sup>13</sup>C-NMR (125 MHz, DMSO-*d*<sub>6</sub>, δ ppm): 165.6, 160.2, 148.6, 148.1, 147.6, 134.4, 127.2, 127.0, 126.0, 125.8, 124.6, 121.9, 121.4, 118.9, 115.3, 48.7.

***N*-(3-Hydroxypyridin-2-yl)-2-(4-oxoquinazolin-3(4*H*)-yl)acetamide (4f)**: Yield 41% as white solid. *R*<sub>f</sub> = 0.24 (Hex:EtOAc = 3:1). Mp 215-217°C. HR-ESI-MS found *m/z* 297.0983 [M+H]<sup>+</sup> (calcd. 297.0988, C<sub>15</sub>H<sub>12</sub>N<sub>4</sub>O<sub>3</sub>). <sup>1</sup>H-NMR (500 MHz, DMSO-*d*<sub>6</sub>, δ ppm): 8.36 (*s*, 1H), 8.15 (*dd*, *J*<sub>1</sub> = 8.0, *J*<sub>2</sub> = 1.5, 1H), 7.90 (*dd*, *J*<sub>1</sub> = 4.5, *J*<sub>2</sub> = 1.5, 1H), 7.87-7.84 (*m*, 1H), 7.41 (*d*, *J* = 7.5, 1H), 7.58-7.55 (*m*, 1H), 7.28 (*dd*, *J*<sub>1</sub> = 7.5, *J*<sub>2</sub> = 1.5, 1H), 7.14 (*dd*, *J*<sub>1</sub> = 8.0, *J*<sub>2</sub> = 4.5, 1H), 5.03 (*s*, 2H). <sup>13</sup>C-NMR (125 MHz, DMSO-*d*<sub>6</sub>, δ ppm): 167.1, 160.2, 148.5, 148.0, 145.1, 145.0, 139.8, 138.4, 134.6, 127.2, 127.1, 126.0, 124.7, 122.2, 121.4, 48.5.

***N*-(2-Amino-4-methoxyphenyl)-2-(4-oxoquinazolin-3(4*H*)-yl)acetamide (4g)**: Yield 83% as white solid. *R*<sub>f</sub> = 0.42 (Hex:EtOAc = 1:4). Mp 219-221°C. FT-IR (KBr) *v*<sub>max</sub> (cm<sup>-1</sup>): 3455, 3359, 3254, 2923, 2853, 1660, 1611, 1542, 1514, 1468, 1378, 1325, 1294, 1262, 1212, 1173, 1105, 1033, 777, 700. HR-ESI-MS found *m/z* 323.1141 [M-H]<sup>-</sup> (calcd. 323.1144, C<sub>17</sub>H<sub>16</sub>N<sub>4</sub>O<sub>3</sub>). <sup>1</sup>H-NMR (500 MHz, DMSO-*d*<sub>6</sub>, δ ppm): 9.43 (*s*, 1H), 8.35 (*s*, 1H), 8.22-8.16 (*m*, 1H), 7.87-7.84 (*m*, 1H), 7.71 (*d*, *J* = 8.0, 1H), 7.57 (*t*, *J* = 7.5, 1H),

6.96 (*d*,  $J = 8.5$ , 1H), 6.29 (*d*,  $J = 2.5$ , 1H), 6.12 (*dd*,  $J_1 = 11.0$ ,  $J_2 = 2.5$ , 1H), 4.90 (*s*, 2H), 4.84 (*s*, 2H), 3.66 (*s*, 3H).  $^{13}\text{C-NMR}$  (125 MHz, DMSO- $d_6$ ,  $\delta$  ppm): 165.7, 160.4, 158.2, 148.6, 148.1, 144.1, 134.4, 127.2, 127.1, 126.0, 121.5, 115.5, 101.7, 100.3, 54.8, 48.6.

**2-(4-Oxoquinazolin-3(4H)-yl)-N-(pyridin-3-ylmethyl)acetamide (4h):** Yield 80% as white solid.  $R_f = 0.13$  (EtOAc:MeOH = 4:1). Mp 215-217°C. FT-IR (KBr)  $\nu_{\text{max}}$  ( $\text{cm}^{-1}$ ): 3279, 3070, 2991, 2956, 1685, 1658, 1608, 1559, 1470, 1367, 1259, 783, 755. ESI-MS found  $m/z$  294.9  $[\text{M}+\text{H}]^+$  (calcd. 295.1,  $\text{C}_{16}\text{H}_{14}\text{N}_4\text{O}_2$ ) and  $m/z$  292.8  $[\text{M}+\text{H}]^+$  (calcd. 293.1,  $\text{C}_{16}\text{H}_{14}\text{N}_4\text{O}_2$ ).  $^1\text{H-NMR}$  (500 MHz, DMSO- $d_6$ ,  $\delta$  ppm): 8.88 (*t*,  $J = 6.0$ , 1H), 8.51 (*d*,  $J = 2.0$ , 1H), 8.47 (*dd*,  $J_1 = 4.5$ ,  $J_2 = 1.5$ , 1H), 8.33 (*s*, 1H), 8.15 (*dd*,  $J_1 = 8.0$ ,  $J_2 = 1.5$ , 1H), 7.86-7.83 (*m*, 1H), 7.71-7.68 (*m*, 2H), 7.58-7.54 (*m*, 1H), 7.36 (*dd*,  $J_1 = 8.0$ ,  $J_2 = 5.0$ , 1H), 4.72 (*s*, 2H), 4.36 (*d*,  $J = 6.0$ , 2H).  $^{13}\text{C-NMR}$  (125 MHz, DMSO- $d_6$ ,  $\delta$  ppm): 166.9, 160.3, 148.7, 148.5, 148.1, 148.1, 135.0, 134.5, 134.4, 127.2, 127.0, 126.0, 123.4, 121.5, 48.2.

**2-(4-Oxoquinazolin-3(4H)-yl)-N-(thiazol-2-yl)acetamide (4i):** Yield 32% as white solid.  $R_f = 0.33$  (Hex:EtOAc = 1:1). Mp 215-217°C. HR-ESI-MS found  $m/z$  287.0599  $[\text{M}+\text{H}]^+$  (calcd. 287.0603,  $\text{C}_{13}\text{H}_{10}\text{N}_4\text{O}_2\text{S}$ ).  $^1\text{H-NMR}$  (500 MHz, DMSO- $d_6$ ,  $\delta$  ppm): 12.61 (*s*, 1H), 8.37 (*s*, 1H), 8.15 (*dd*,  $J_1 = 8.0$ ,  $J_2 = 1.0$ , 1H), 7.89-7.86 (*m*, 1H), 7.73 (*d*,  $J = 7.5$ , 1H), 7.60-7.56 (*m*, 1H), 7.50 (*d*,  $J = 3.5$  Hz, 1H), 7.25 (*d*,  $J = 3.5$  Hz, 1H), 4.98 (*s*, 2H).  $^{13}\text{C-NMR}$  (125 MHz, DMSO- $d_6$ ,  $\delta$  ppm): 165.7, 160.2, 157.5, 148.3, 148.0, 137.8, 134.6, 127.2, 125.9, 121.3, 113.9, 48.2.

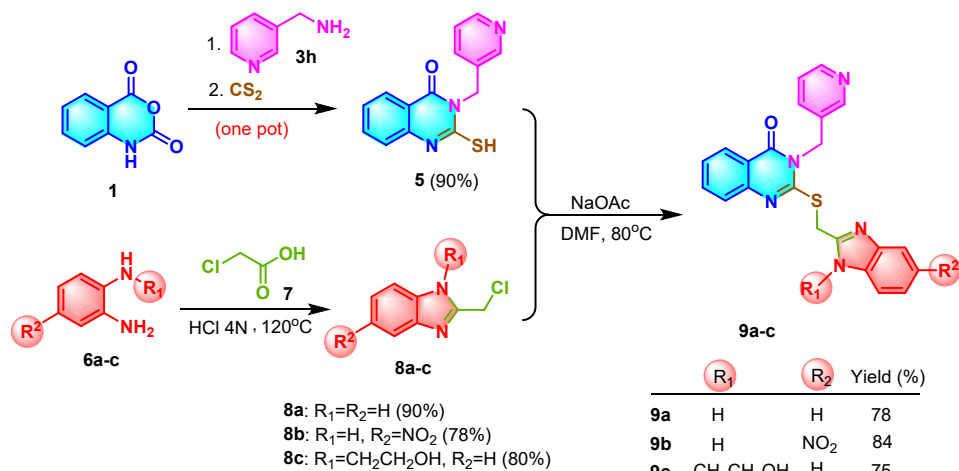

**Scheme S2. Synthesis of compounds 5, 9a-c**

### Synthetic procedure of compound 5

A mixture of isatoic anhydride **1** (1.0 mmol) and amine **3h** (1.1 mmol) in EtOH (5 mL) was stirred at room temperature for 15 minutes and then KOH (1.0 mmol) was added. The resulting mixture was continued to stir for another 15 minutes and then  $\text{CS}_2$  (0.25 mL) was slowly added. The reaction mixture was refluxed

at 80°C for 3h. At the end of the reaction, the excess EtOH was evaporated under reduced pressure. The obtained residue was suspended in water (20 mL) followed by adding an aqueous solution of 10% HCl until pH ~ 7. The precipitated solid was filtered and dried at 50°C. Column chromatography of the crude product obtained the compound **5**.

### Synthetic procedure of compound (8a-c)

To a mixture of *N*-substituted *o*-phenylenediamine **6a-c** (1.0 mmol) in aqueous solution of 4 N HCl (2 mL) was added 2-chloroacetic acid **7**. The resulting mixture was refluxed at 120°C for 2h. The reaction mixture was neutralized by aqueous saturated solution of NaHCO<sub>3</sub>. The aqueous layer was extracted with EtOAc (5×20 mL). The combined organic layers were washed with aqueous saturated solution of NaCl, dried over Na<sub>2</sub>SO<sub>4</sub>, filtered and solvent was evaporated under reduced pressure. Column chromatography of the crude product obtained compounds **8a-c**.

### Synthetic procedure of compound 9a-c

A mixture of **5** (0.2 mmol), **8a-c** (0.2 mmol) and NaOAc (0.6 mmol) in DMF (0.5 mL) was stirred at 80°C for 30 minutes. At the end of the reaction, water (50 mL) was added. The aqueous layer was extracted with EtOAc (5×5 mL). The combined organic layers were washed with aqueous saturated solution of NaCl, dried over Na<sub>2</sub>SO<sub>4</sub>, filtered and solvent was evaporated under reduced pressure. Column chromatography of the crude product obtained the compounds **9a-c**.

**2-Mercapto-3-(pyridin-3-ylmethyl)quinazolin-4(3H)-one (5)**: Yield 90% as white solid. <sup>1</sup>H-NMR (500 MHz, DMSO-*d*<sub>6</sub>, δ ppm): 8.62 (*s*, 1H), 8.45 (*d*, *J* = 4.0, 1H), 7.97 (*dd*, *J*<sub>1</sub> = 8.0, *J*<sub>2</sub> = 1.0, 1H), 7.78-7.75 (*m*, 1H), 7.43 (*d*, *J* = 8.0, 1H), 7.35 (*td*, *J*<sub>1</sub> = 7.5, *J*<sub>2</sub> = 1.0, 1H), 7.32 (*dd*, *J*<sub>1</sub> = 8.0, *J*<sub>2</sub> = 5.0, 1H), 5.68 (*s*, 2H).

**3-(((1H-Benzo[*d*]imidazol-2-yl)methyl)thio)-2-(pyridin-3-ylmethyl)isoquinolin-1(2H)-one (9a)**: Yield 78% as white solid. FT-IR (KBr)  $\nu_{\max}$  (cm<sup>-1</sup>): 3633, 3199, 1684, 1553, 1431, 1159, 745. HR-ESI-MS found *m/z* 400.1232 [M+H]<sup>+</sup> (calcd. 400.1232, C<sub>22</sub>H<sub>17</sub>N<sub>5</sub>OS). <sup>1</sup>H-NMR (500 MHz, DMSO-*d*<sub>6</sub>, δ ppm): 8.61 (*d*, *J* = 2.0, 1H), 8.49 (*dd*, *J*<sub>1</sub> = 4.5, *J*<sub>2</sub> = 1.5, 1H), 8.12 (*dd*, *J*<sub>1</sub> = 8.0, *J*<sub>2</sub> = 1.0, 1H), 7.85-7.82 (*m*, 1H), 7.72 (*dt*, *J*<sub>1</sub> = 8.0, *J*<sub>2</sub> = 2.0, 1H), 7.66 (*d*, *J* = 8.0, 1H), 7.52-7.48 (*m*, 3H), 7.35 (*ddd*, *J*<sub>1</sub> = 8.0, *J*<sub>2</sub> = 5.0, *J*<sub>3</sub> = 1.0, 1H), 7.18-7.15 (*m*, 1H), 5.28 (*s*, 2H), 4.82 (*s*, 2H). <sup>13</sup>C-NMR (125 MHz, DMSO-*d*<sub>6</sub>, δ ppm): 160.9, 155.6, 149.6, 148.7, 148.6, 146.7, 135.0, 134.8, 131.4, 126.5, 126.3, 123.6, 121.9, 118.8, 44.9, 29.5.

**3-(((5-Nitro-1H-benzo[*d*]imidazol-2-yl)methyl)thio)-2-(pyridin-3-ylmethyl)isoquinolin-1(2H)-one (9b)**. Yield 84% as white solid. FT-IR (KBr)  $\nu_{\max}$  (cm<sup>-1</sup>): 3438, 2994, 1695, 1686, 1548, 1472, 1336, 1167, 670. HR-ESI-MS found *m/z* 445.1081 [M+H]<sup>+</sup> (calcd. 445.1083, C<sub>22</sub>H<sub>16</sub>N<sub>6</sub>O<sub>3</sub>S). <sup>1</sup>H-NMR (500 MHz,

DMSO- $d_6$ ,  $\delta$  ppm): 13.08 (s, 1H), 8.62 (*d*,  $J = 1.5$ , 1H), 8.49 (*dd*,  $J_1 = 4.5$ ,  $J_2 = 1.5$ , 1H), 8.42 (*d*,  $J = 1.5$ , 1H), 8.11 (*dd*,  $J_2 = 8.0$ ,  $J_2 = 1.5$ , 1H), 8.08 (*dd*,  $J_1 = 9.0$ ,  $J_2 = 2.0$ , 1H), 7.84-7.81 (*m*, 1H), 7.72 (*dt*,  $J_1 = 8.0$ ,  $J_2 = 2.0$ , 1H), 7.67 (*d*,  $J = 9.0$ , 1H), 7.63 (*d*,  $J = 8.0$ , 1H), 7.49 (*td*,  $J_1 = 7.5$ ,  $J_2 = 1.0$ , 1H), 7.36 (*ddd*,  $J_1 = 8.0$ ,  $J_2 = 5.0$ ,  $J_3 = 1.0$ , 1H), 5.39 (s, 2H), 5.87 (s, 2H).  $^{13}\text{C}$ -NMR (125 MHz, DMSO- $d_6$ ,  $\delta$  ppm): 160.9, 155.4, 148.8, 148.6, 146.6, 142.5, 134.9, 134.7, 131.3, 126.5, 126.3, 126.1, 123.6, 118.8, 44.9, 29.4.

**3-(((1-(2-Hydroxyethyl)-5-nitro-1H-benzo[d]imidazol-2-yl)methyl)thio)-2-(pyridin-3-**

**ylmethyl)isoquinolin-1(2H)-one (9c):** Yield 75% as white solid. FT-IR (KBr)  $\nu_{\text{max}}$  ( $\text{cm}^{-1}$ ): 3449, 2947, 1675, 1551, 1414, 721. HR-ESI-MS found  $m/z$  444.1493  $[\text{M}+\text{H}]^+$  (calcd. 444.1494,  $\text{C}_{24}\text{H}_{21}\text{N}_5\text{O}_2\text{S}$ ).  $^1\text{H}$ -NMR (500 MHz, DMSO- $d_6$ ,  $\delta$  ppm): 8.61 (*d*,  $J = 2.0$ , 1H), 8.49 (*dd*,  $J_1 = 4.5$ ,  $J_2 = 1.5$ , 1H), 8.11 (*dd*,  $J_1 = 8.0$ ,  $J_2 = 1.5$ , 1H), 7.85-7.82 (*m*, 1H), 7.73 (*dt*,  $J_1 = 8.0$ ,  $J_2 = 2.0$ , 1H), 7.63 (*d*,  $J = 8.0$ , 1H), 7.57 (*d*,  $J = 9.0$ , 1H), 7.49 (*td*,  $J_1 = 8.0$ ,  $J_2 = 1.0$ , 1H), 7.35 (*ddd*,  $J_1 = 7.5$ ,  $J_2 = 4.5$ ,  $J_3 = 0.5$ , 1H), 7.21 (*td*,  $J_1 = 7.5$ ,  $J_2 = 1.0$ , 1H), 7.16 (*td*,  $J_1 = 7.5$ ,  $J_2 = 1.0$ , 1H), 5.38 (s, 2H), 4.92 (s, 2H), 4.47 (*t*,  $J = 5.5$ , 2H), 3.75 (*t*,  $J = 5.5$ , 2H).  $^{13}\text{C}$ -NMR (125 MHz, DMSO- $d_6$ ,  $\delta$  ppm): 170.4, 160.9, 155.8, 150.2, 148.7, 148.6, 146.7, 142.1, 135.2, 135.0, 134.7, 131.4, 126.6, 126.3, 126.0, 123.6, 122.1, 121.6, 118.7, 118.6, 110.5, 59.7, 44.9, 28.5, 25.3.

## S2. Spectrometry data

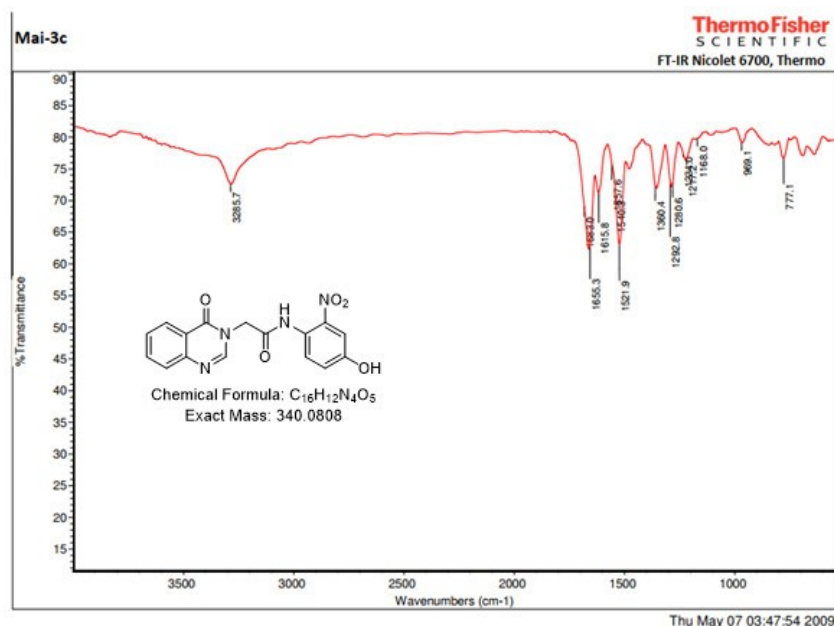

Figure S1. IR spectrum of compound 4a

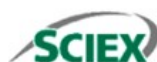

Created with SCIEX OS 1.2

CENTER FOR RESEARCH AND TECHNOLOGY TRANSFER  
PHARMACEUTICAL CHEMISTRY LABORATORY  
01, Mac Dinh Chi St., Dist 1, Ho Chi Minh City, Vietnam. Phone: (84) 907 070 939

### ANALYSIS REPORT

#### Injection details

|                  |                       |                    |              |
|------------------|-----------------------|--------------------|--------------|
| Sample name      | MAI-3c                | Vial position      | 16           |
| Sample file name | SER_wif2 - HUE        | Inject volume      | 5.00         |
| Acquisition date | 26/06/2019 1:24:54 PM | Acquisition method | ESI_NEG_SCAN |
| Operator         | CB21261708            | Instrument name    | X500R_QTOF   |

#### Full mass spectrum

Spectrum from MAI\_3c\_(1)ESI.wif2 (sample 1) - MAI\_3c\_(1)ESI - TOF MS (70 - 1500) from 6.120 min, noise filtered (noise multiplier = 1.5), Gaussian smoothed (0.5 points)

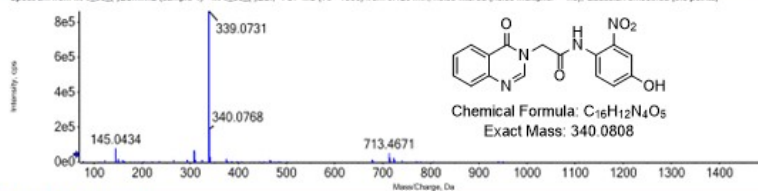

#### Expanded spectrum

Spectrum from MAI\_3c\_(1)ESI.wif2 (sample 1) - MAI\_3c\_(1)ESI - TOF MS (70 - 1500) from 6.120 min, noise filtered (noise multiplier = 1.5), Gaussian smoothed (0.5 points)

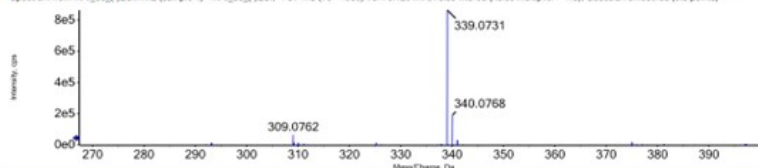

Figure S2. MS spectrum of compound 4a



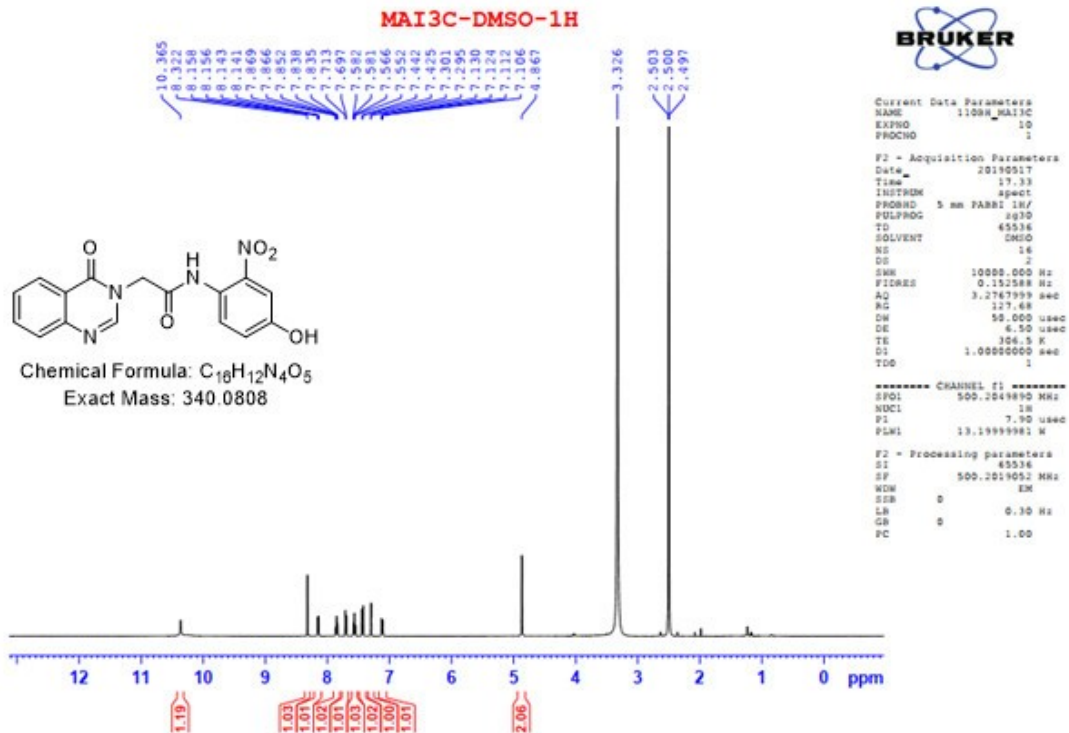

Figure S3.  $^1\text{H}$ -NMR spectrum of compound 4a

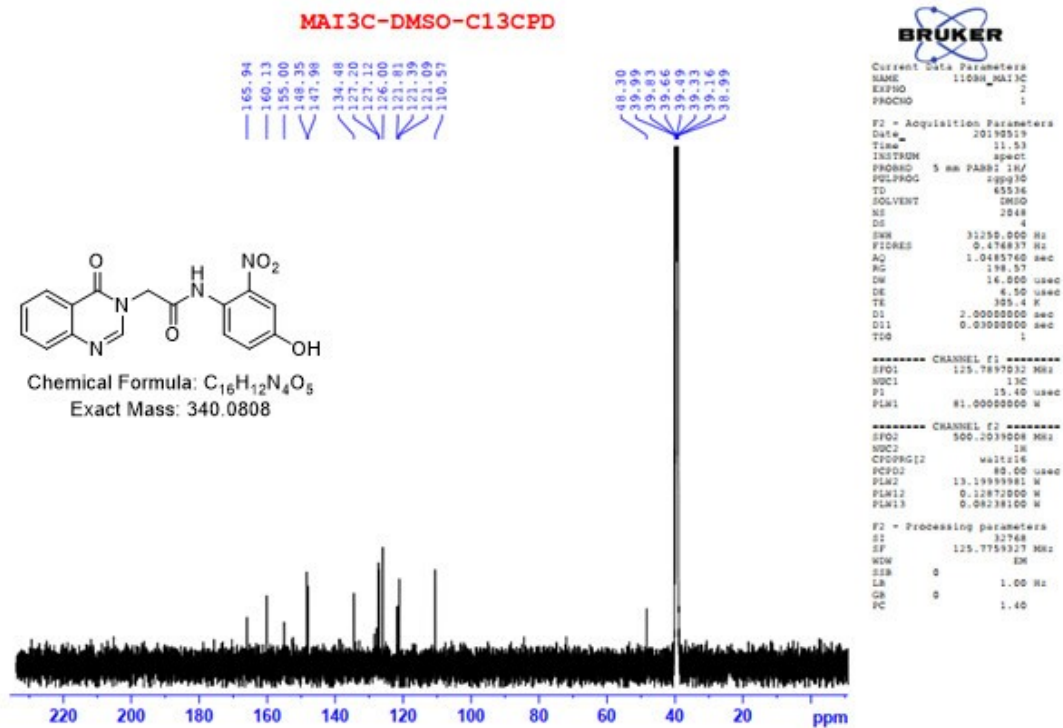

Figure S4.  $^{13}\text{C}$ -NMR spectrum of compound 4a

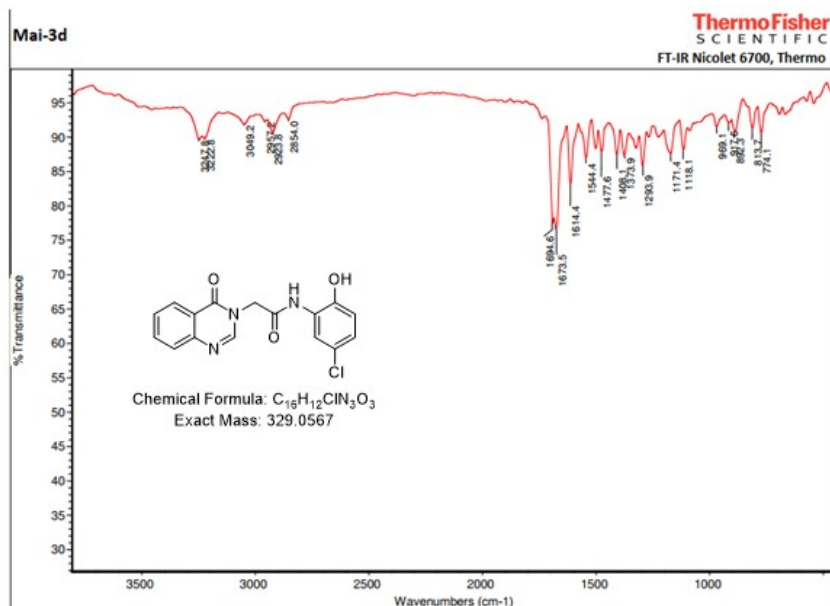

Figure S5. IR spectrum of compound 4b

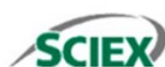

Created with SCIEX OS 1.2

CENTER FOR RESEARCH AND TECHNOLOGY TRANSFER  
PHARMACEUTICAL CHEMISTRY LABORATORY  
01, Mac Dinh Chi St., Dist 1, Ho Chi Minh City, Vietnam. Phone: (84) 907 070 939

### ANALYSIS REPORT

#### Injection details

|                  |                        |                    |              |
|------------------|------------------------|--------------------|--------------|
| Sample name      | MAI-3d                 | Vial position      | 51           |
| Sample file name | SER_wiff2 - HUE        | Inject volume      | 5.00         |
| Acquisition date | 23/08/2019 02:01:54 PM | Acquisition method | ESI_POS_SCAN |
| Operator         | CB21261708             | Instrument name    | X500R.QTOF   |

#### Full mass spectrum

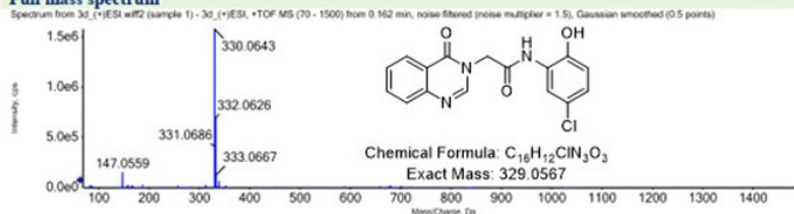

#### Expanded spectrum

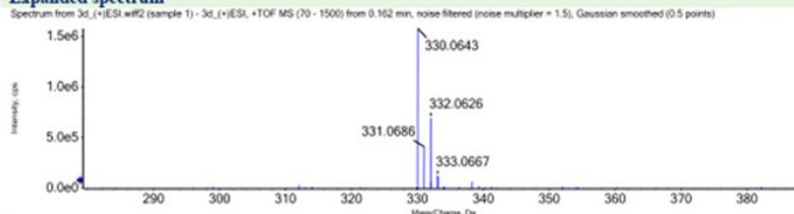

Figure S6. MS spectrum of compound 4b

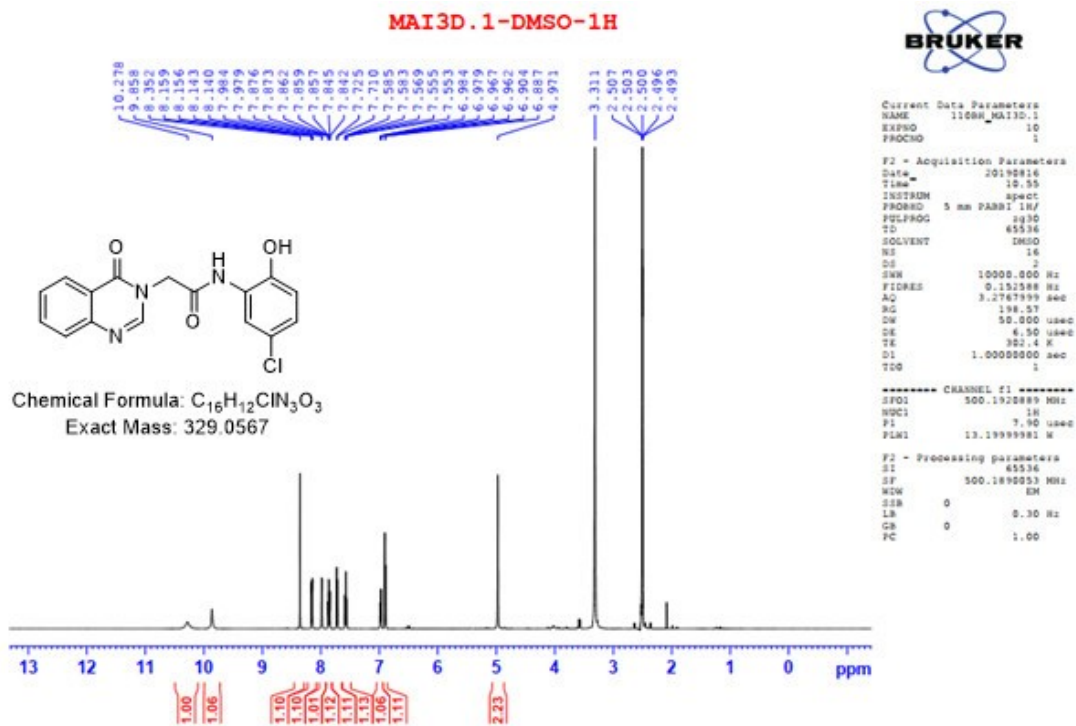

Figure S7. <sup>1</sup>H-NMR spectrum of compound 4b

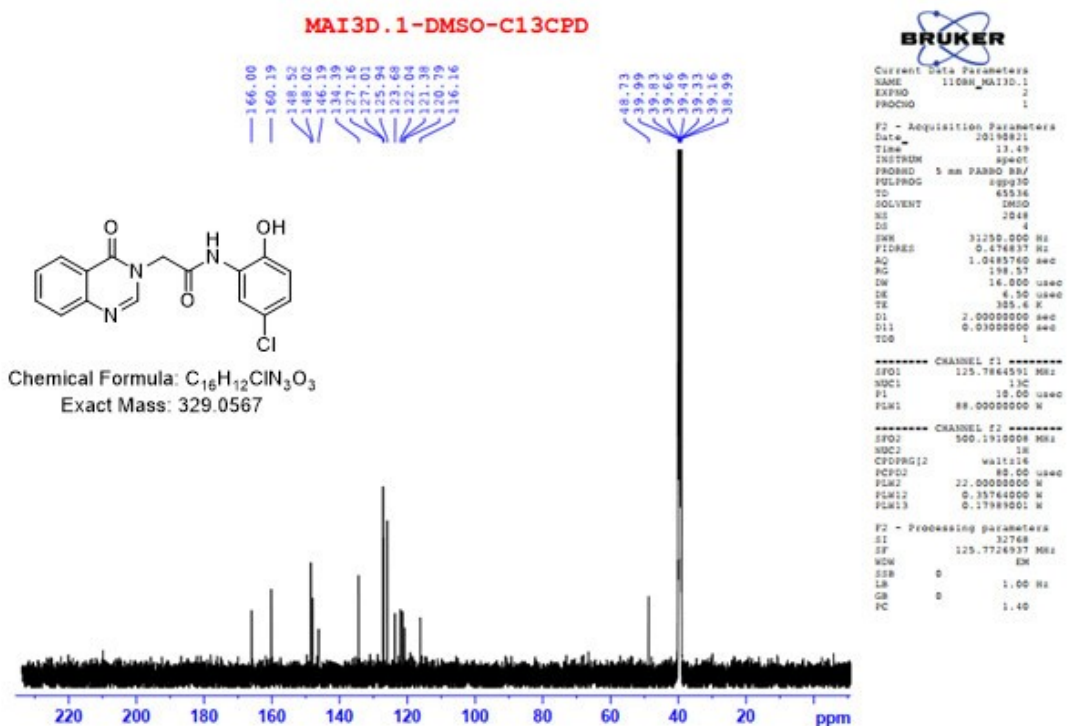

Figure S8. <sup>13</sup>C-NMR spectrum of compound 4b

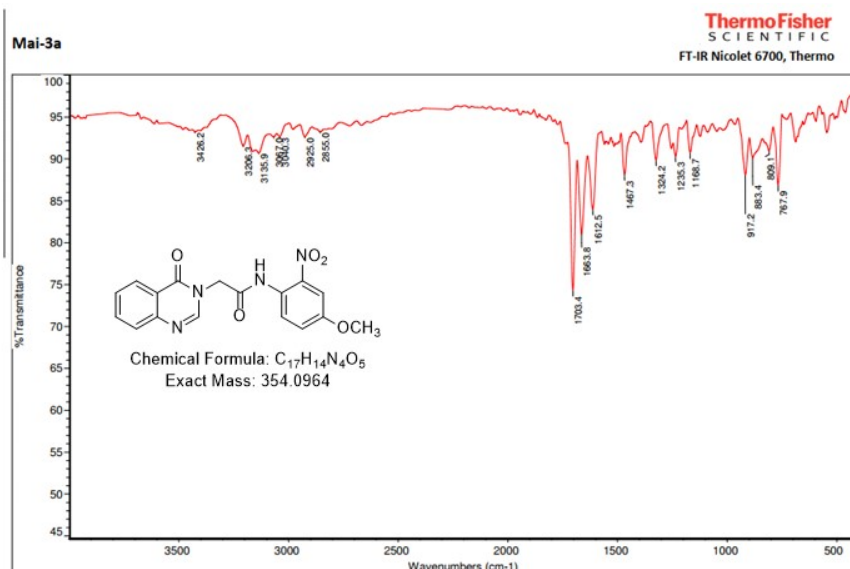

Figure S9. IR spectrum of compound 4c

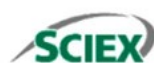

Created with SCIEX OS 1.2

CENTER FOR RESEARCH AND TECHNOLOGY TRANSFER  
PHARMACEUTICAL CHEMISTRY LABORATORY  
01, Mac Dinh Chi St., Dist 1, Ho Chi Minh City, Vietnam. Phone: (84) 907 070 939

### ANALYSIS REPORT

#### Injection details

|                  |                       |                    |               |
|------------------|-----------------------|--------------------|---------------|
| Sample name      | MAI3A2                | Vial position      | 21            |
| Sample file name | SER_wiff2-HUE         | Inject volume      | 5.00          |
| Acquisition date | 19/03/2019 1:04:54 PM | Acquisition method | APCI_NEG_SCAN |
| Operator         | CB21261708            | Instrument name    | X500x QTOF    |

#### Full mass spectrum

Spectrum from MAI3A2-APCI-MS (sample 1) - MAI3A2-APCI - TOF MS (70 - 1000) from 0.218 min, noise filtered (noise multiplier = 1.5)

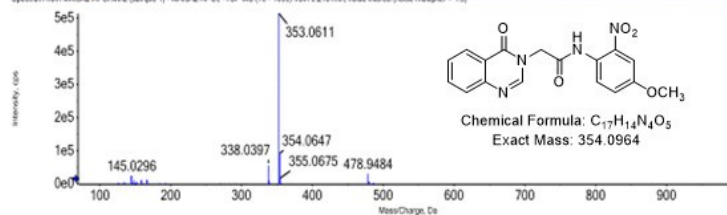

#### Expanded spectrum

Spectrum from MAI3A2-APCI-MS (sample 1) - MAI3A2-APCI - TOF MS (70 - 1000) from 0.218 min, noise filtered (noise multiplier = 1.5)

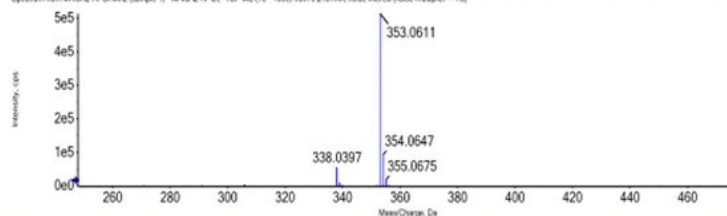

Figure S10. MS spectrum of compound 4c

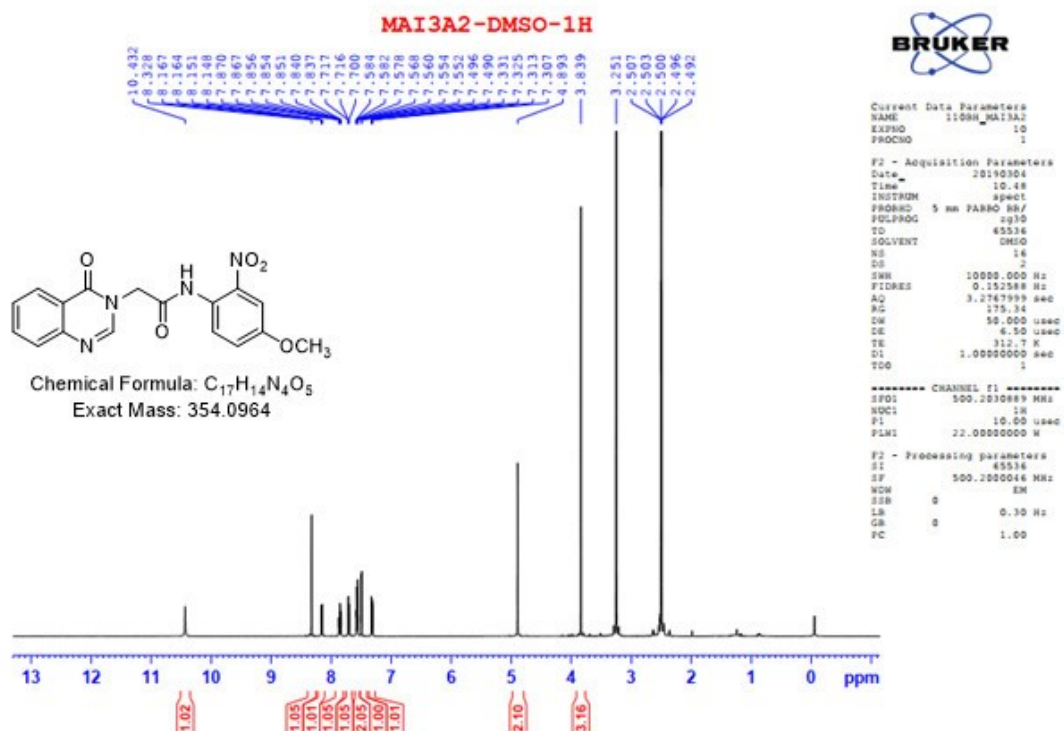

Figure S11. <sup>1</sup>H-NMR spectrum of compound 4c

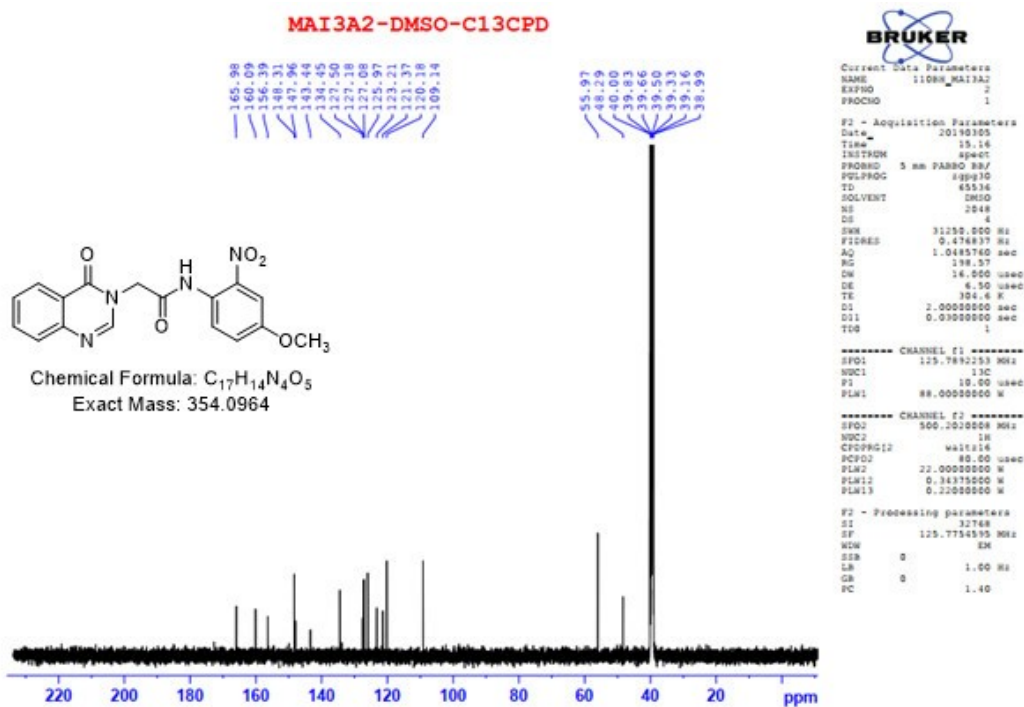

Figure S12. <sup>13</sup>C-NMR spectrum of compound 4c



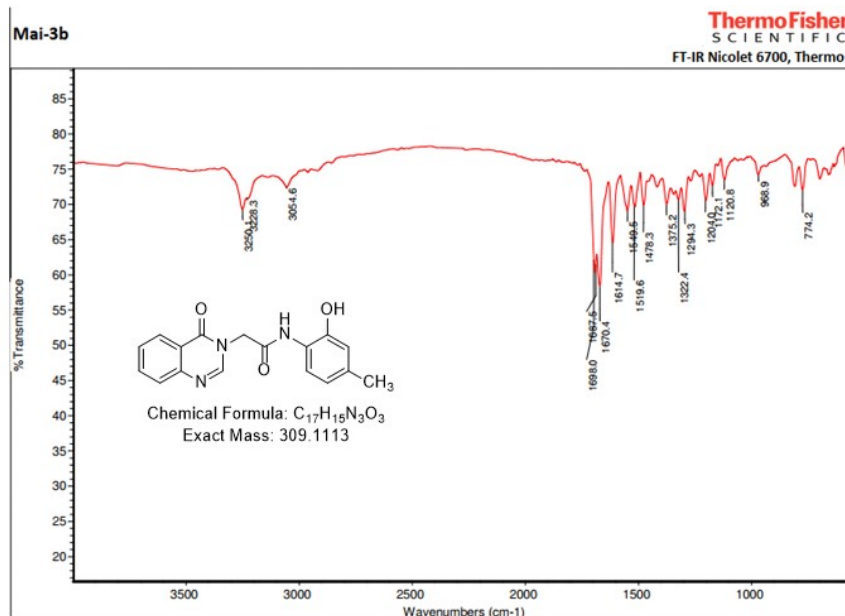

Figure S13. IR spectrum of compound 4d

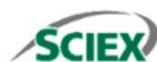

Created with SCIEX OS 1.2

CENTER FOR RESEARCH AND TECHNOLOGY TRANSFER  
PHARMACEUTICAL CHEMISTRY LABORATORY  
01, Mac Dinh Chi St., Dist 1, Ho Chi Minh City, Vietnam. Phone: (84) 907 070 939

### ANALYSIS REPORT

#### Injection details

|                  |                       |                    |              |
|------------------|-----------------------|--------------------|--------------|
| Sample name      | MAI-3B                | Vial position      | 17           |
| Sample file name | SER_wiff2-HUE         | Inject volume      | 5.00         |
| Acquisition date | 18/04/2019 1:04:54 PM | Acquisition method | ESI_POS_SCAN |
| Operator         | CB21261708            | Instrument name    | X500R_QTOF   |

#### Full mass spectrum

Spectrum from MAI-3B+ESI+HUE.wiff2 (sample 1) - MAI-3B+ESI+HUE, +TOF MS (70 - 1500) from 0.176 min, noise filtered (noise multiplier = 1.5), Gaussian smoothed (0.5 points)

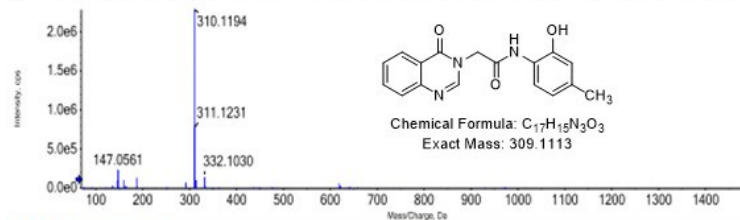

#### Expanded spectrum

Spectrum from MAI-3B+ESI+HUE.wiff2 (sample 1) - MAI-3B+ESI+HUE, +TOF MS (70 - 1500) from 0.176 min, noise filtered (noise multiplier = 1.5), Gaussian smoothed (0.5 points)

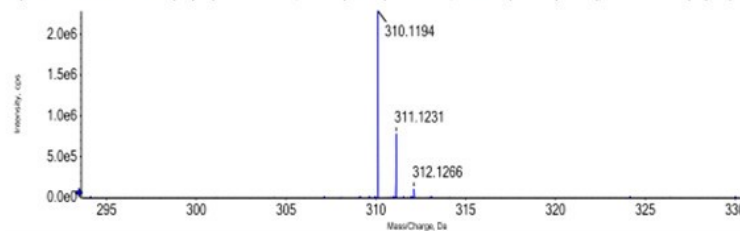

Figure S14. MS spectrum of compound 4d

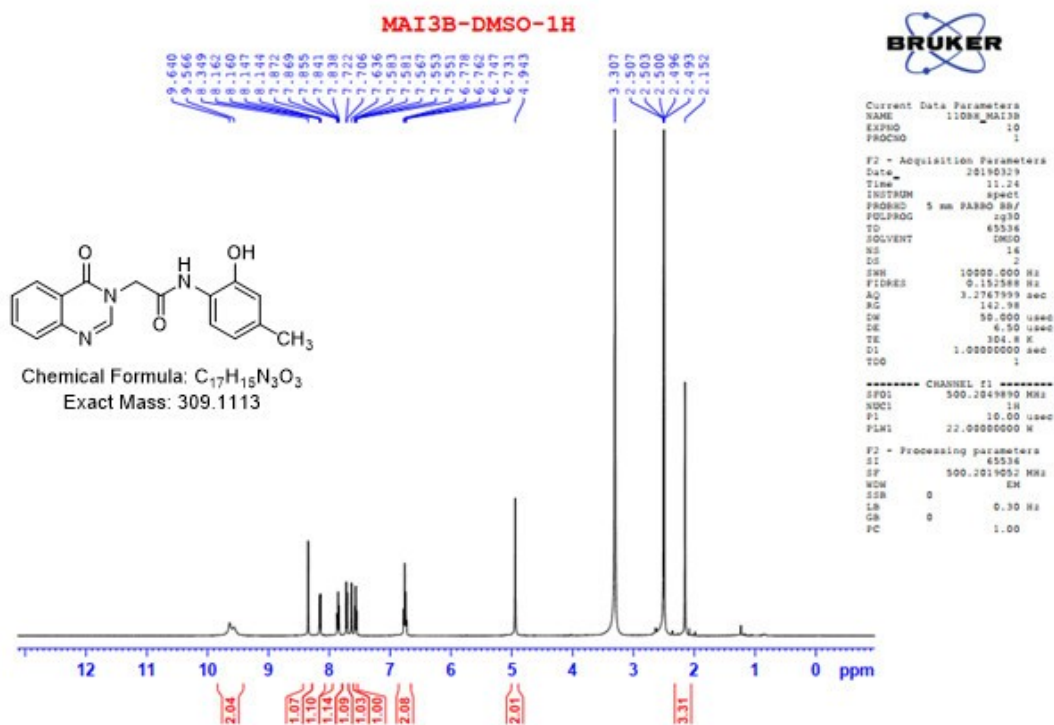

Figure S15. <sup>1</sup>H-NMR spectrum of compound 4d

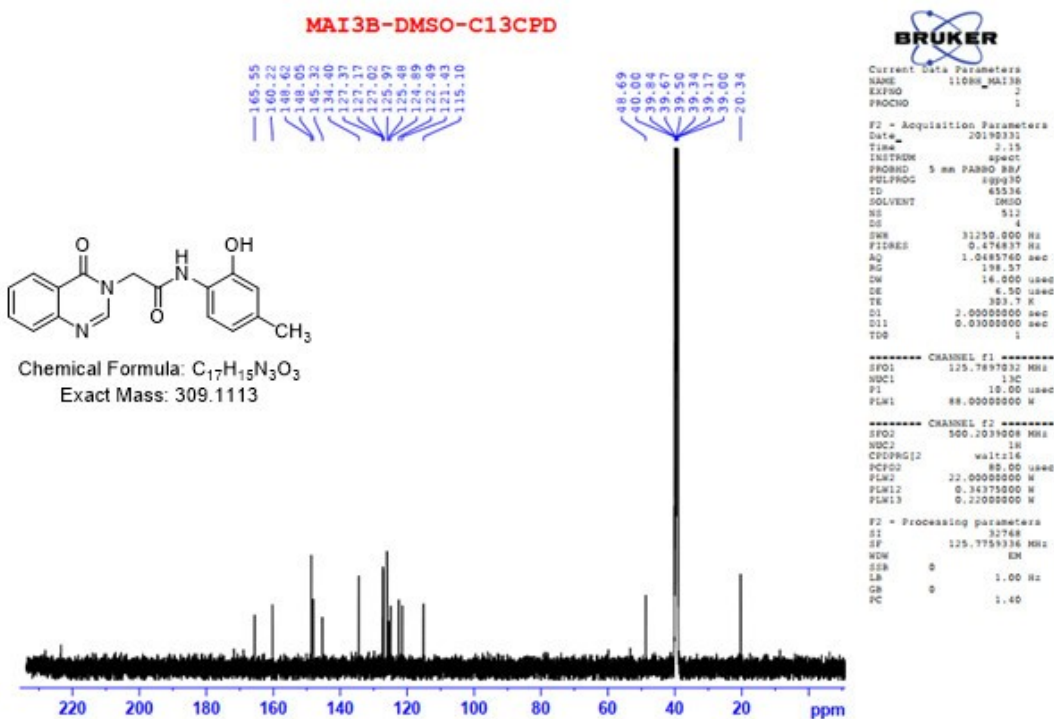

Figure S16. <sup>13</sup>C-NMR spectrum of compound 4d

### Display Report - Selected Window Selected Analysis

**Analysis Name:** 110BH 4a.d **Instrument:** LC-MSD-Trap-SL **Print Date:** 11/23/2018 8:42:29 AM  
**Method:** Cot150x3mm.m **Operator:** 2195410AE0000514 **Acq. Date:** 11/23/2018 8:40:54 AM  
**Sample Name:** 110BH 4a  
**Analysis Info:** Column Eclipse XDB-C18, 4.6 x150mm

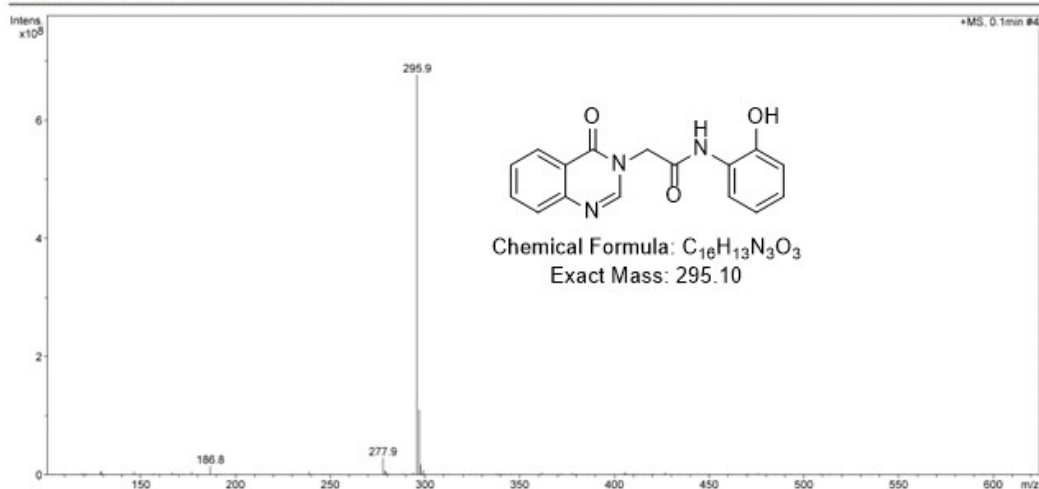

MSD Trap Report v 4 (A4-Opt2)

Page 1 of 1

Agilent Technologies

**Figure S17.** MS  $[M+H]^+$  spectrum of compound **4e**

### Display Report - Selected Window Selected Analysis

**Analysis Name:** 110BH Qui4.d **Instrument:** LC-MSD-Trap-SL **Print Date:** 10/31/2018 12:39:26 PM  
**Method:** Cot150x3mm.m **Operator:** 2195410AE0000514 **Acq. Date:** 10/31/2018 12:37:30 PM  
**Sample Name:** 110BH Qui4  
**Analysis Info:** Column Eclipse XDB-C18, 4.6 x150mm

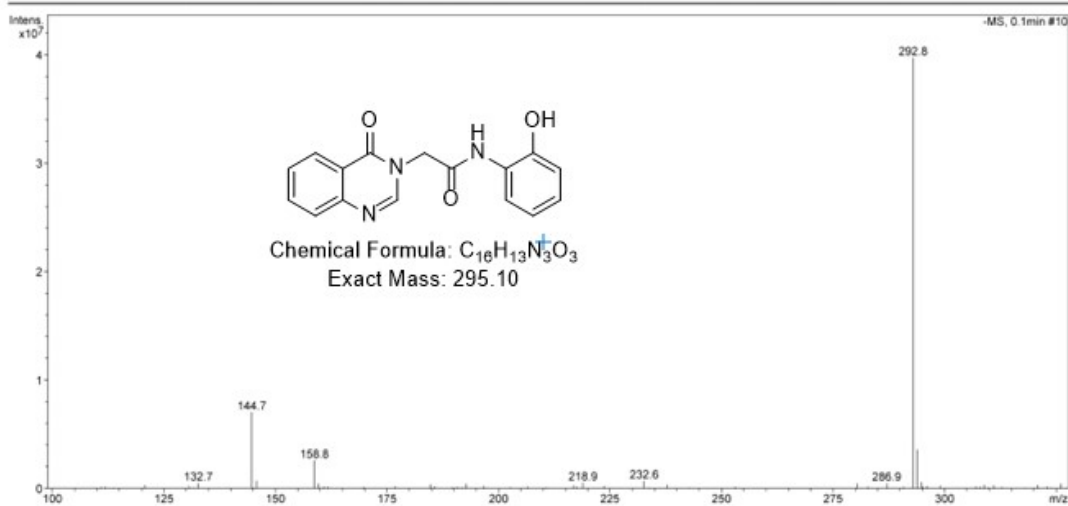

MSD Trap Report v 4 (A4-Opt2)

Page 1 of 1

Agilent Technologies

**Figure S18.** MS  $[M-H]^-$  spectrum of compound **4e**



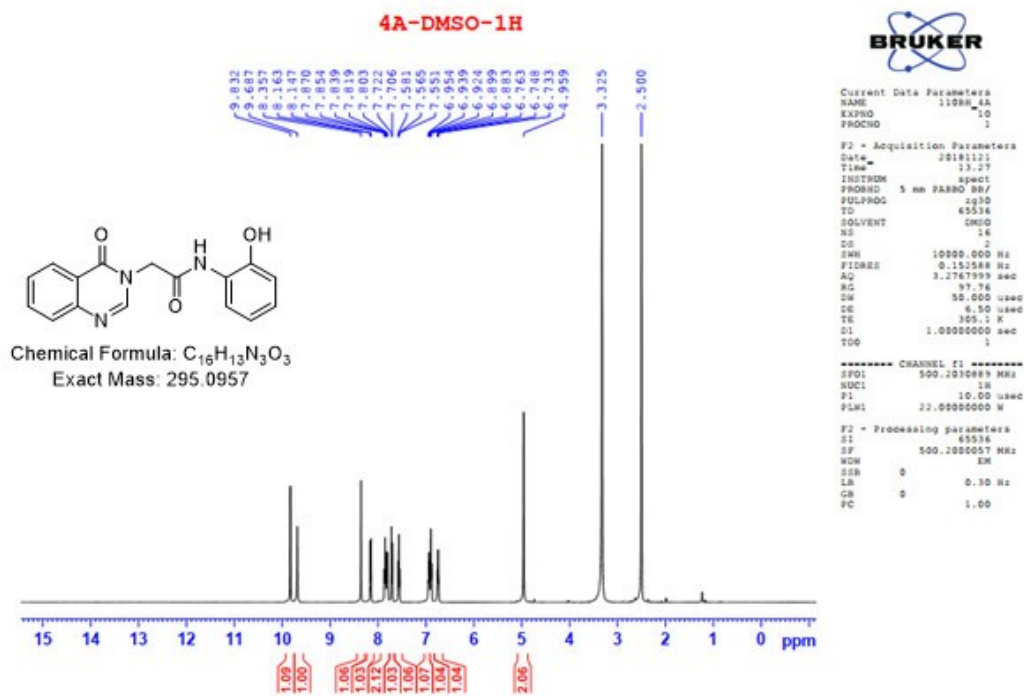

Figure S19.  $^1\text{H}$ -NMR spectrum of compound 4e

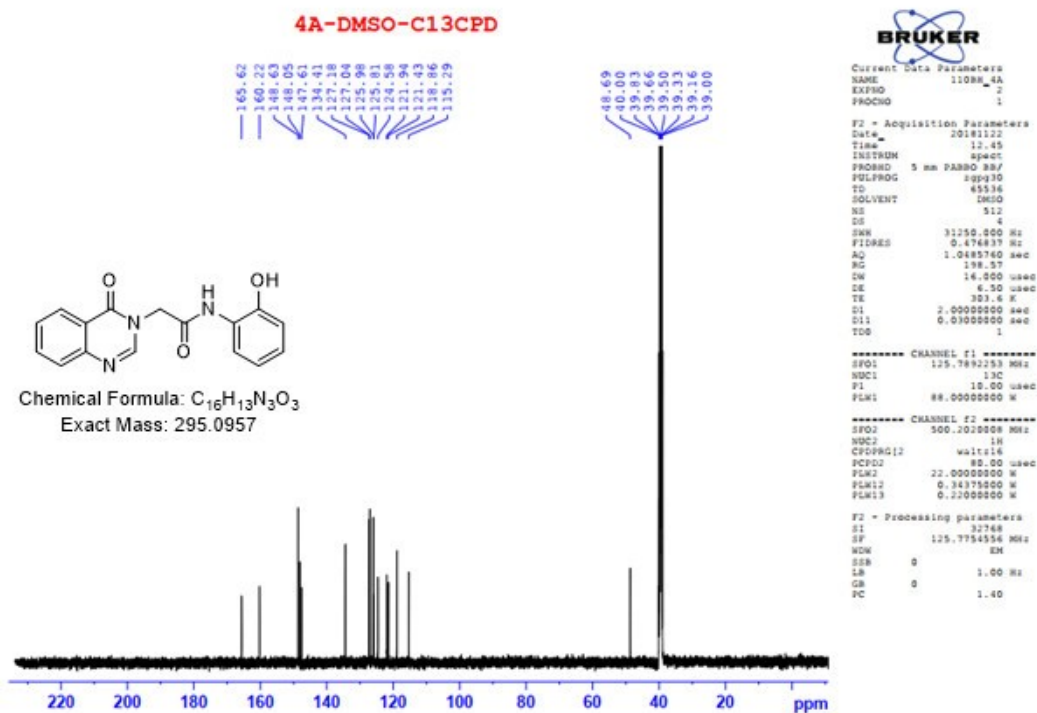

Figure S20.  $^{13}\text{C}$ -NMR spectrum of compound 4e

## ANALYSIS REPORT

### Injection details

|                         |                       |                           |              |
|-------------------------|-----------------------|---------------------------|--------------|
| <i>Sample name</i>      | GIANG-QUI 9b          | <i>Vial position</i>      | 35           |
| <i>Sample file name</i> | SER_wiff2 - HUE       | <i>Inject volume</i>      | 5.00         |
| <i>Acquisition date</i> | 10/01/2020 3:25:14 PM | <i>Acquisition method</i> | ESI_POS_SCAN |
| <i>Operator</i>         | CB21261708            | <i>Instrument name</i>    | X500R_QTOF   |

### Full mass spectrum

Spectrum from GIANG-QUI 9b\_(+)ESI.wiff2 (sample 1) - GIANG-QUI 9b\_(+)ESI - TOF MS (50 - ... from 0.125 min, noise filtered (noise multiplier = 1.5), Gaussian smoothed (0.5 points))

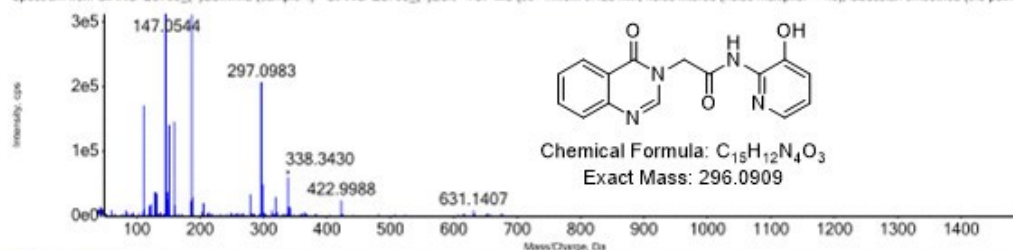

### Expanded spectrum

Spectrum from GIANG-QUI 9b\_(+)ESI.wiff2 (sample 1) - GIANG-QUI 9b\_(+)ESI - TOF MS (50 - ... from 0.125 min, noise filtered (noise multiplier = 1.5), Gaussian smoothed (0.5 points))

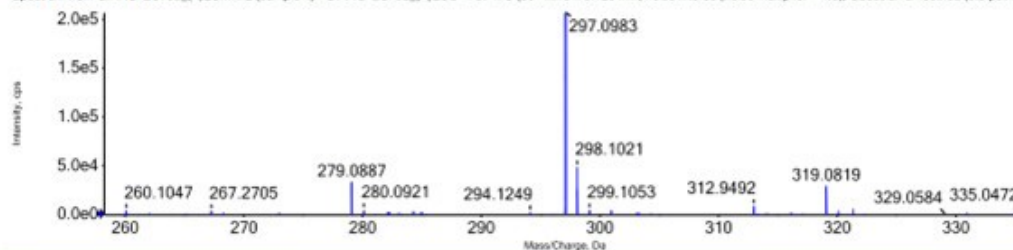

Figure S21. MS spectrum of compound 4f

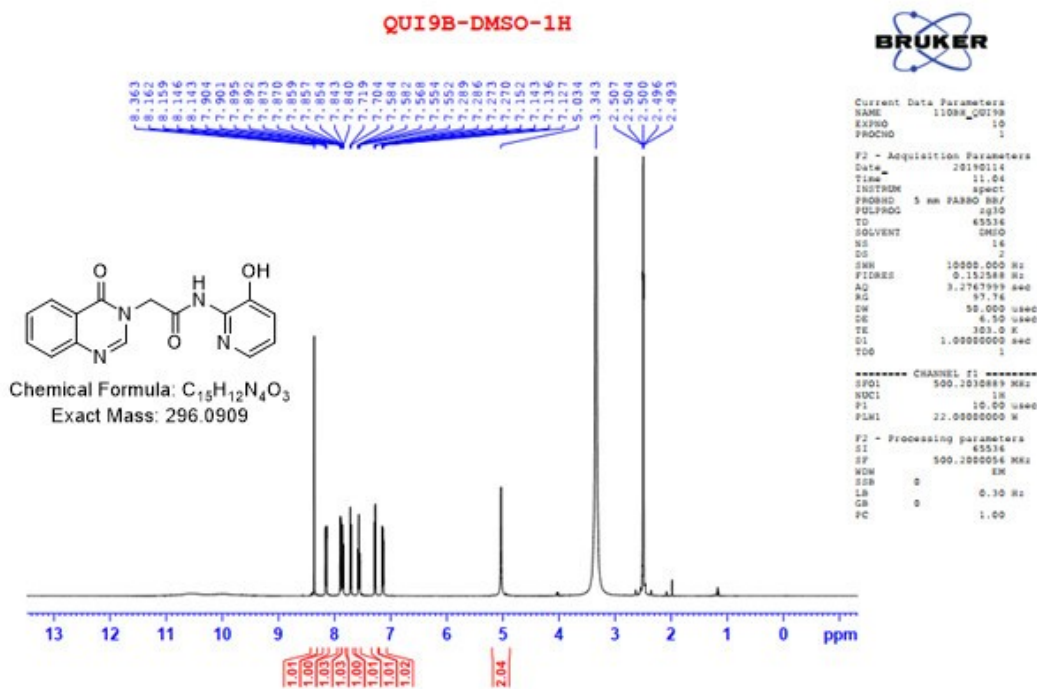

Figure S22.  $^1\text{H-NMR}$  spectrum of compound **4f**

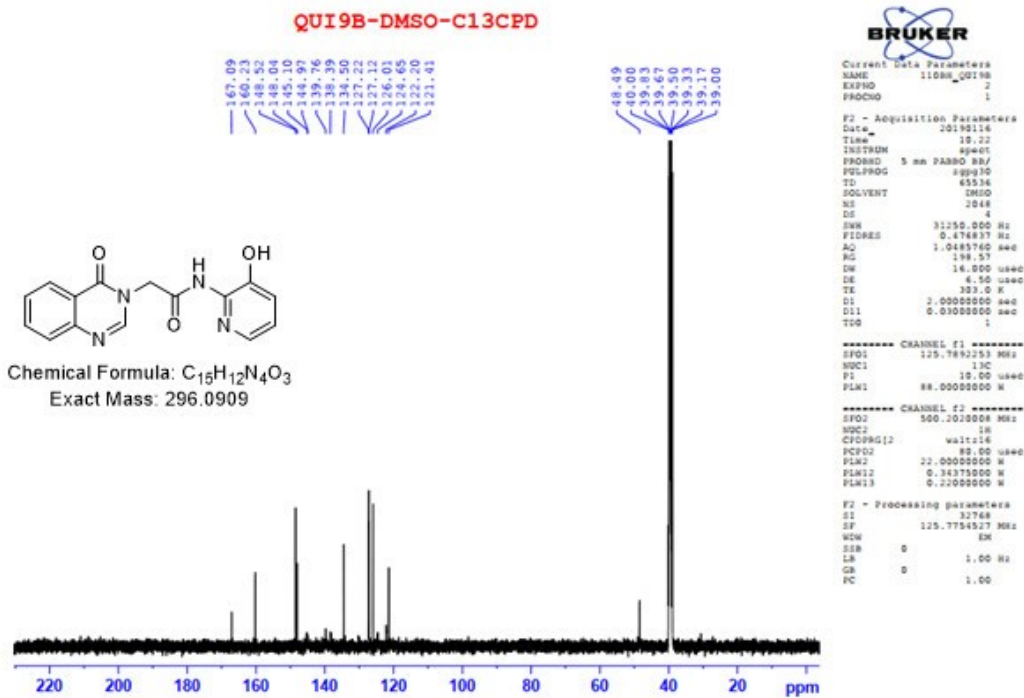

Figure S23.  $^{13}\text{C-NMR}$  spectrum of compound **4f**

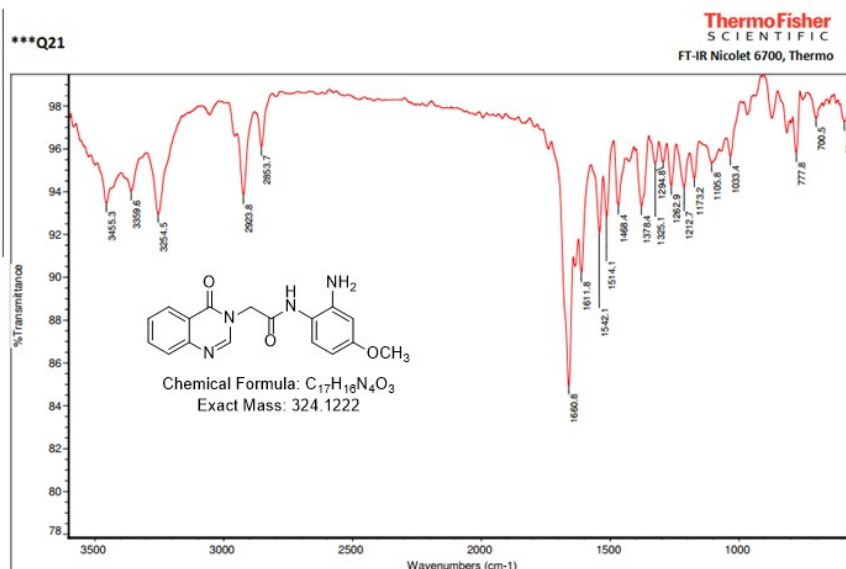

Figure S24. MS spectrum of compound 4g

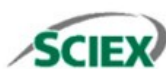

Created with SCIEX OS 1.2

CENTER FOR RESEARCH AND TECHNOLOGY TRANSFER  
PHARMACEUTICAL CHEMISTRY LABORATORY  
01, Mac Dinh Chi St., Dist 1, Ho Chi Minh City, Vietnam. Phone: (84) 907 070 939

### ANALYSIS REPORT

#### Injection details

|                  |                       |                    |              |
|------------------|-----------------------|--------------------|--------------|
| Sample name      | Q21                   | Vial position      | 19           |
| Sample file name | SER_wiff2 - HUE       | Inject volume      | 5.00         |
| Acquisition date | 26/06/2019 1:46:54 PM | Acquisition method | ESI_NEG_SCAN |
| Operator         | CB21261708            | Instrument name    | X500R QTOF   |

#### Full mass spectrum

Spectrum from Q21\_1-ESI\_wiff2 (sample 1) - Q21\_1-ESI - TOF MS (70 - 1500) from 0.153 min, noise filtered (noise multiplier = 1.5), Gaussian smoothed (0.5 points)

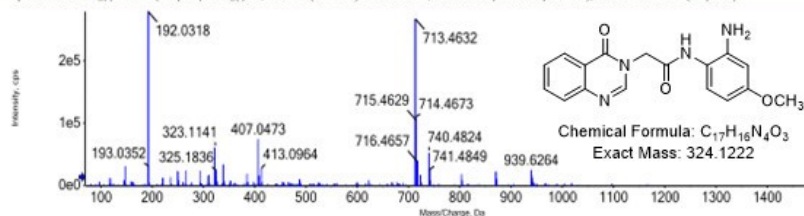

#### Expanded spectrum

Spectrum from Q21\_1-ESI\_wiff2 (sample 1) - Q21\_1-ESI - TOF MS (70 - 1500) from 0.153 min, noise filtered (noise multiplier = 1.5), Gaussian smoothed (0.5 points)

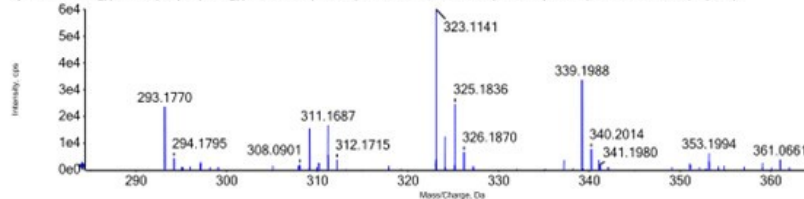

Figure S25. MS spectrum of compound 4g

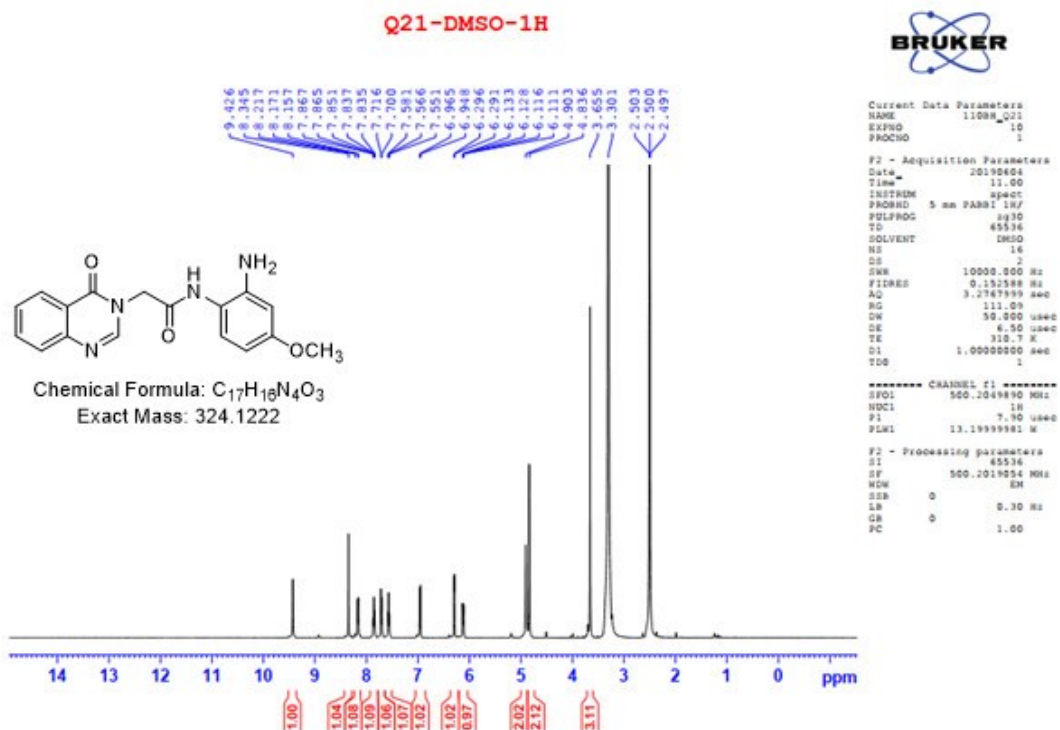

Figure S26.  $^1\text{H-NMR}$  spectrum of compound **4g**

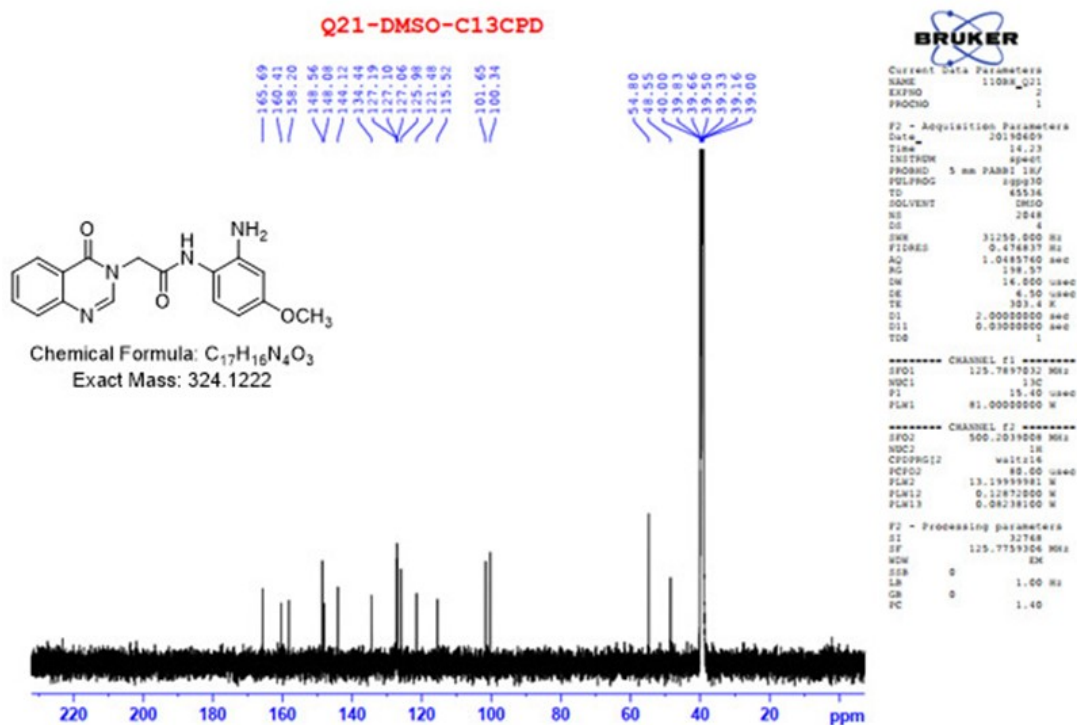

Figure S27.  $^{13}\text{C-NMR}$  spectrum of compound **4g**



### Display Report - Selected Window Selected Analysis

**Analysis Name:** 110BH Qui4.d **Instrument:** LC-MSD-Trap-SL **Print Date:** 10/31/2018 12:39:03 PM  
**Method:** Cot150x3mm.m **Operator:** 2195410AE0000514 **Acq. Date:** 10/31/2018 12:37:30 PM  
**Sample Name:** 110BH Qui4  
**Analysis Info:** Column Eclipse XDB-C18, 4.6 x150mm

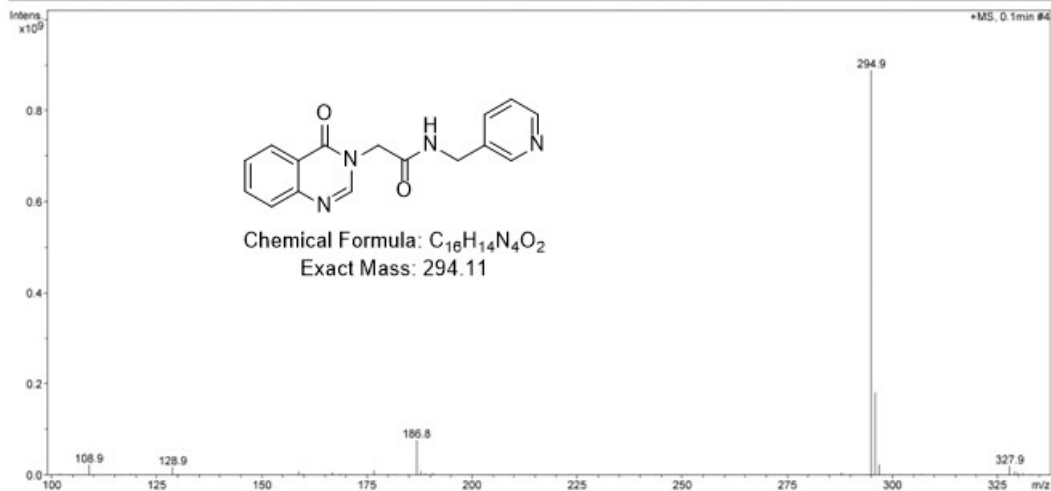

MSD Trap Report v 4 (A4-Opt2)

Page 1 of 1

Agilent Technologies

**Figure S28.** MS [M+H]<sup>+</sup> spectrum of compound **4h**

### Display Report - Selected Window Selected Analysis

**Analysis Name:** 110BH Qui4.d **Instrument:** LC-MSD-Trap-SL **Print Date:** 10/31/2018 12:39:26 PM  
**Method:** Cot150x3mm.m **Operator:** 2195410AE0000514 **Acq. Date:** 10/31/2018 12:37:30 PM  
**Sample Name:** 110BH Qui4  
**Analysis Info:** Column Eclipse XDB-C18, 4.6 x150mm

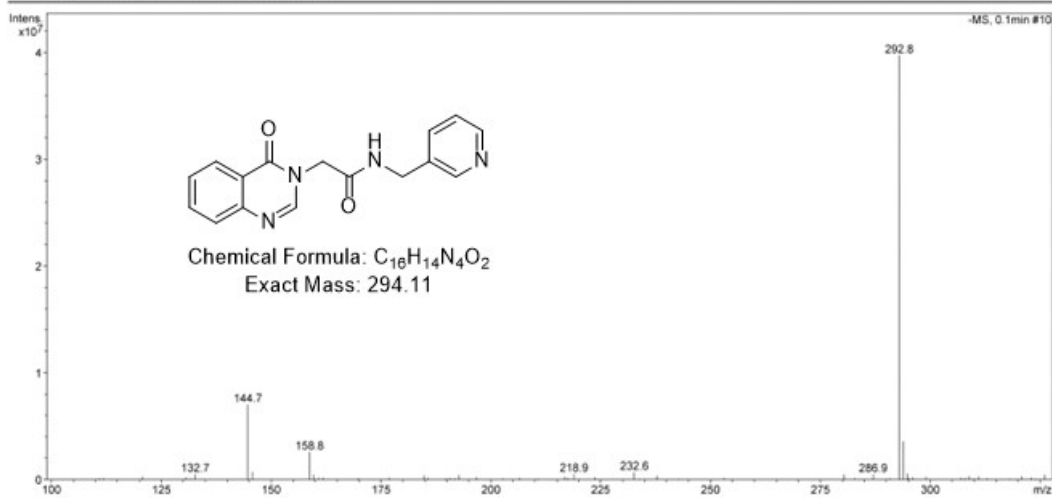

MSD Trap Report v 4 (A4-Opt2)

Page 1 of 1

Agilent Technologies

**Figure S29.** MS [M-H]<sup>-</sup> spectrum of compound **4h**

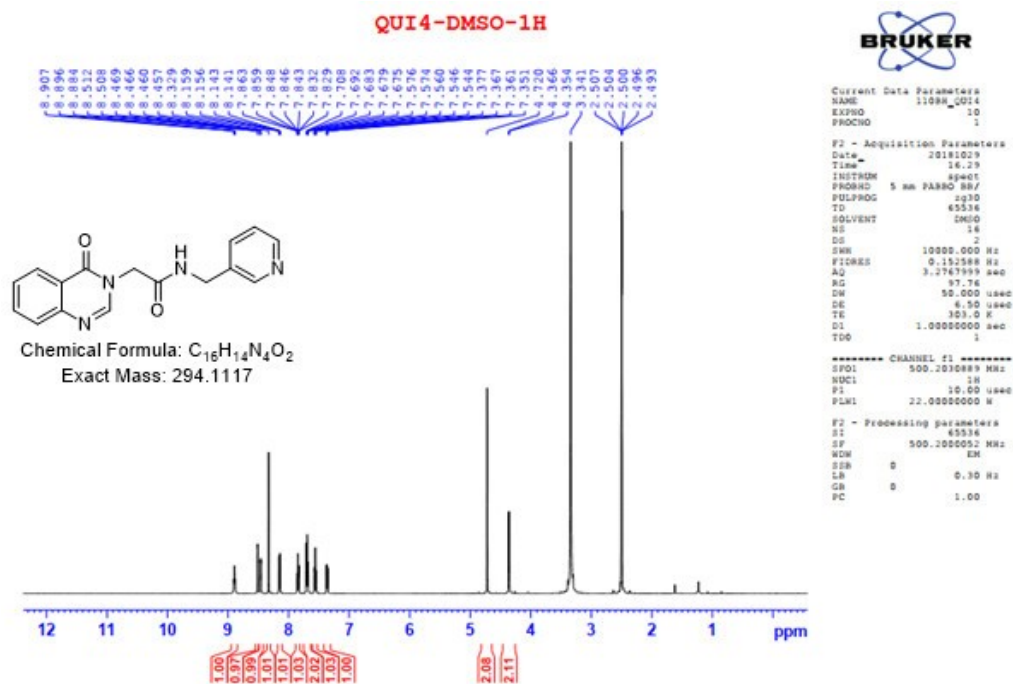

Figure S30. <sup>1</sup>H-NMR spectrum of compound 4h

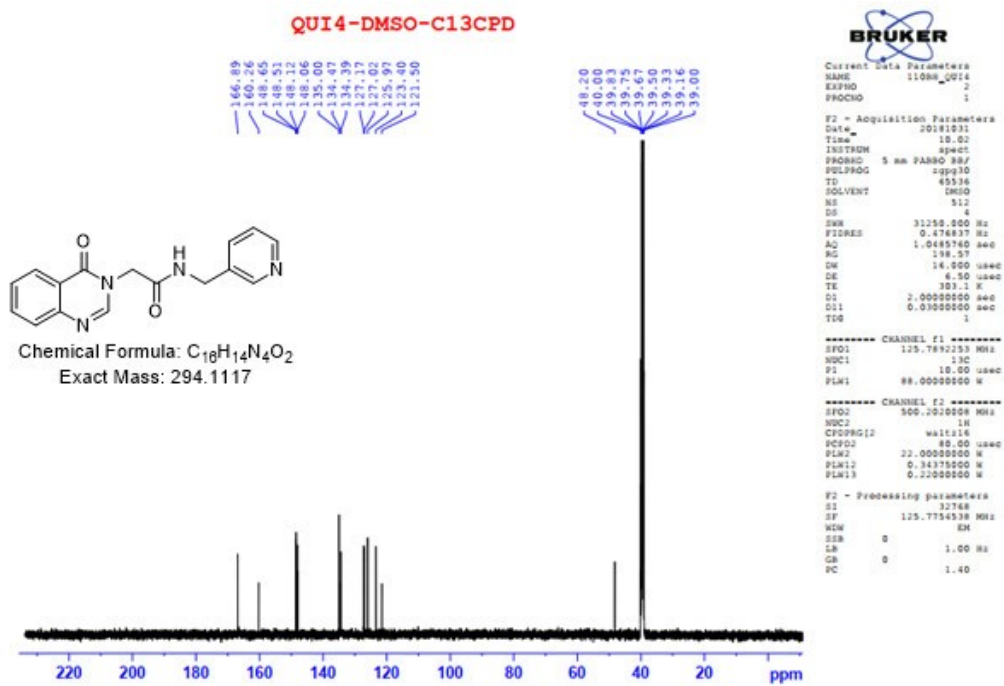

Figure S31. <sup>13</sup>C-NMR spectrum of compound 4h

**CENTER FOR RESEARCH AND TECHNOLOGY TRANSFER**  
**PHARMACEUTICAL CHEMISTRY LABORATORY**  
 01, Mac Dinh Chi St., Dist 1, Ho Chi Minh City, Vietnam. Phone: (84) 907 070 939

## ANALYSIS REPORT

### Injection details

|                         |                       |                           |              |
|-------------------------|-----------------------|---------------------------|--------------|
| <i>Sample name</i>      | HIEU-QUI 9c           | <i>Vial position</i>      | 36           |
| <i>Sample file name</i> | SER_wiff2 - HUE       | <i>Inject volume</i>      | 5.00         |
| <i>Acquisition date</i> | 10/01/2020 3:27:14 PM | <i>Acquisition method</i> | ESI_POS_SCAN |
| <i>Operator</i>         | CB21261708            | <i>Instrument name</i>    | X500R QTÖF   |

### Full mass spectrum

Spectrum from HIEU-QUI 9c\_(+ESI.wiff2 (sample 1) - HIEU-QUI 9c\_(+ESI\_+TOF MS (50 - 15... from 0.143 min, noise filtered (noise multiplier = 1.5), Gaussian smoothed (0.5 points)

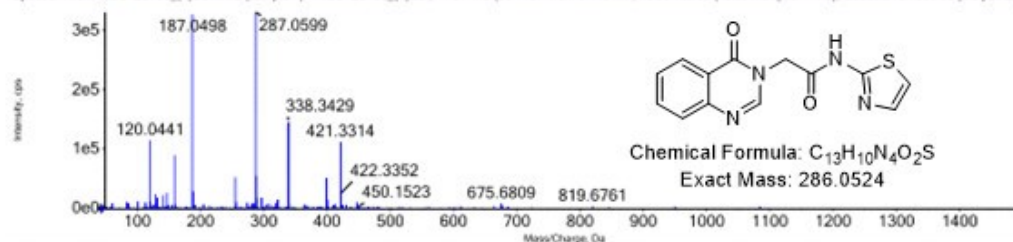

### Expanded spectrum

Spectrum from HIEU-QUI 9c\_(+ESI.wiff2 (sample 1) - HIEU-QUI 9c\_(+ESI\_+TOF MS (50 - 15... from 0.143 min, noise filtered (noise multiplier = 1.5), Gaussian smoothed (0.5 points)

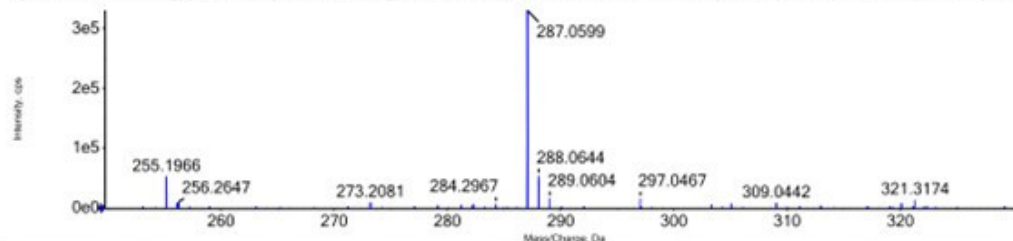

**Figure S32.** MS spectrum of compound **4i**



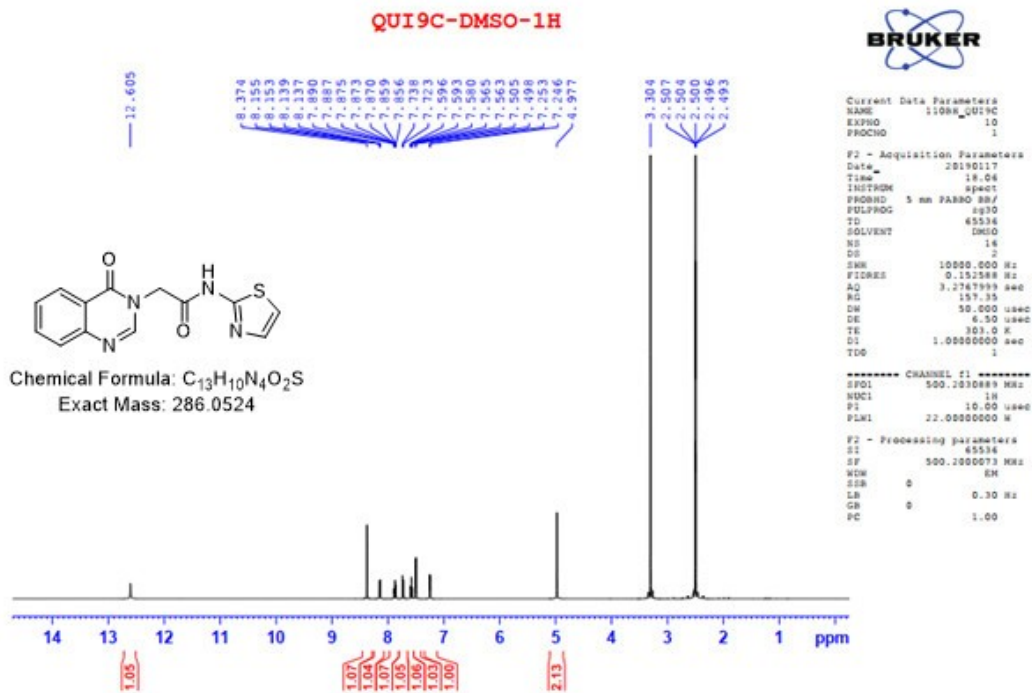

Figure S33.  $^1\text{H}$ -NMR spectrum of compound **4i**

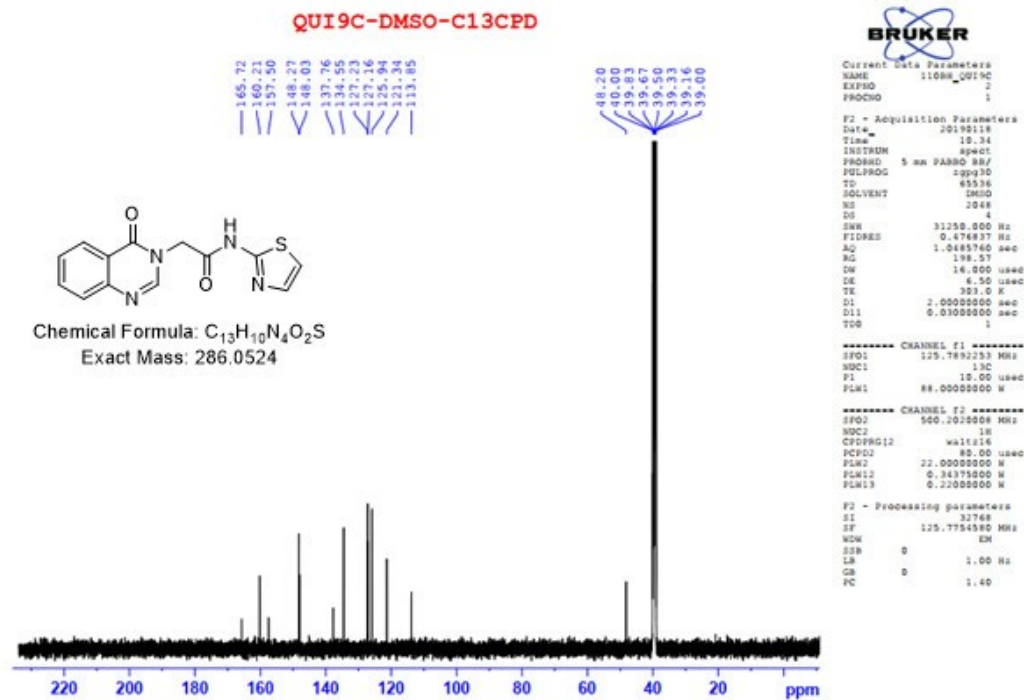

Figure S34.  $^{13}\text{C}$ -NMR spectrum of compound **4i**

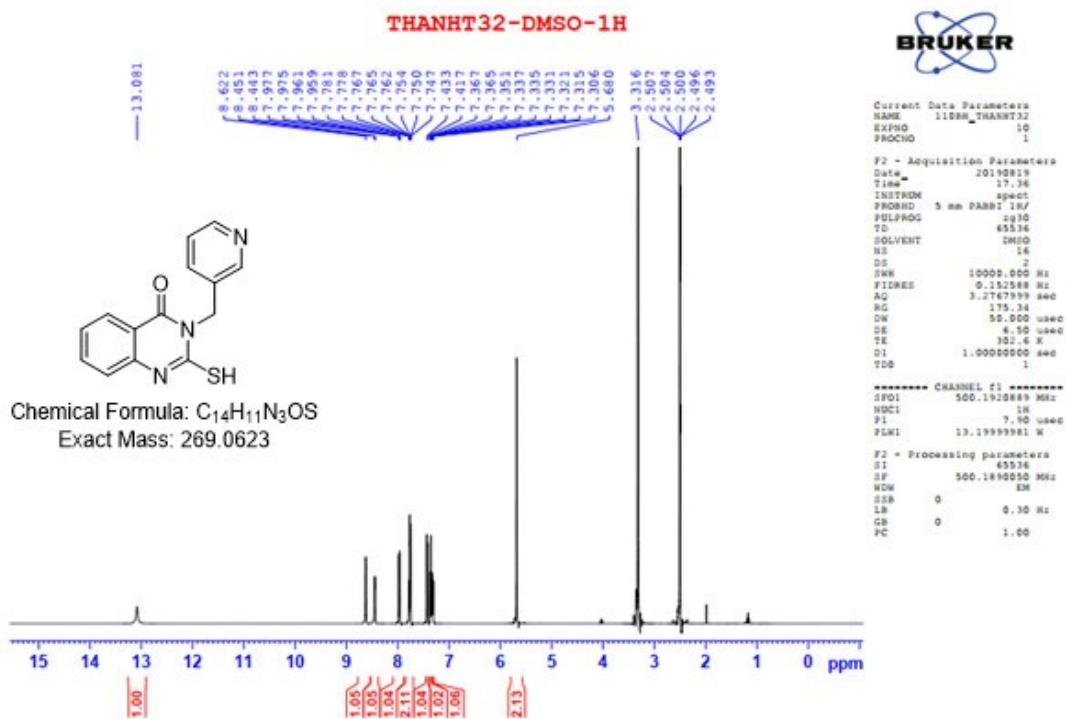

**Figure S35.**  $^1\text{H-NMR}$  spectrum of compound **5**

March 26, 2020 1:32

## Report Details

Report Location C:\Users\Administrator\Desktop\TTPT\26032  
 0\Thanh 45  
 Report Creator Analyst  
 Report Date March 26, 2020 1:32

## Sample Details

Filename C:\Users\Administrator\Desktop\TTPT\2603  
 20\Thanh 45.sp  
 Creation Date 3/26/2020 12:05:08 PM  
 Analyst Analyst  
 X-Axis Units cm-1  
 X-Axis start value 4000  
 X-Axis end value 400  
 Data interval -1  
 Number of points 3601  
 Y-Axis Units %T  
 Description Sample 280 By Analyst Date Thursday,  
 March 26 2020  
 Pathlength (mm) 1

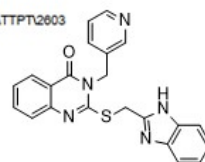

Chemical Formula: C<sub>22</sub>H<sub>17</sub>N<sub>5</sub>OS  
 Exact Mass: 399.1154

## Spectrum

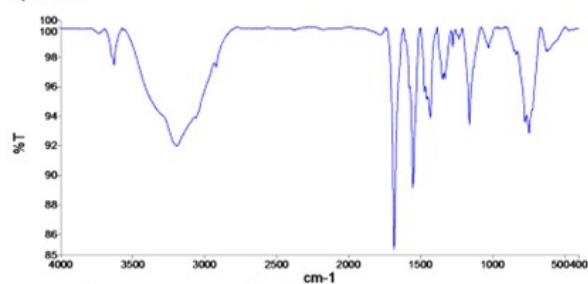

Figure S36. IR spectrum of compound 9a

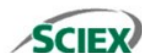

Created with SCIEX OS 1.2

CENTER FOR RESEARCH AND TECHNOLOGY TRANSFER  
 PHARMACEUTICAL CHEMISTRY LABORATORY  
 01, Mac Dinh Chi St., Dist 1, Ho Chi Minh City, Vietnam. Phone: (84) 907 070 939

## ANALYSIS REPORT

## Injection details

|                  |                       |                    |              |
|------------------|-----------------------|--------------------|--------------|
| Sample name      | THANH_T45             | Vial position      | 5            |
| Sample file name | SER. wiff2 - THANH    | Inject volume      | 5.00         |
| Acquisition date | 11/10/2019 5:10:50 PM | Acquisition method | ESI_POS_SCAN |
| Operator         | CB21261708            | Instrument name    | X500R QTOF   |

## Full mass spectrum

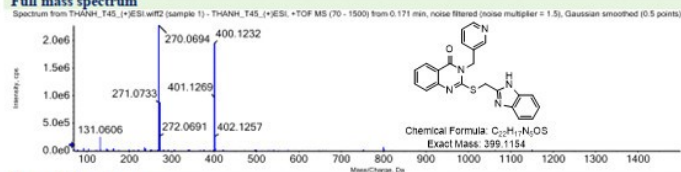

## Expanded spectrum

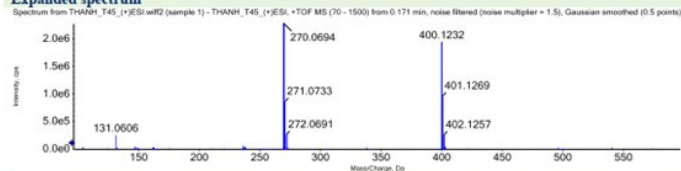

Figure S37. MS spectrum of compound 9a

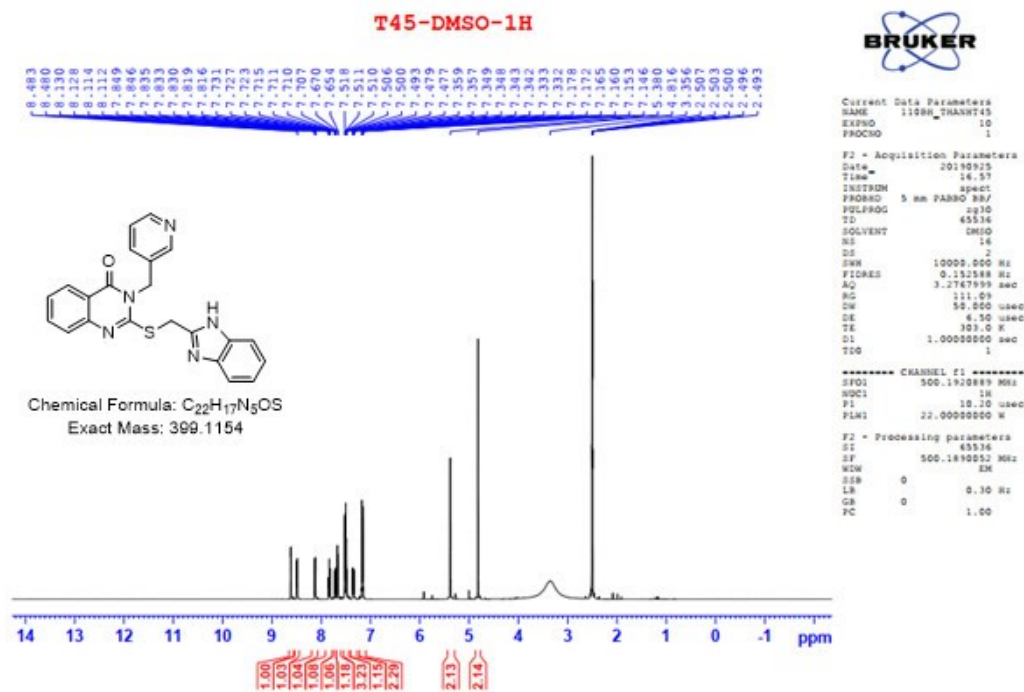

Figure S38.  $^1\text{H}$ -NMR spectrum of compound **9a**

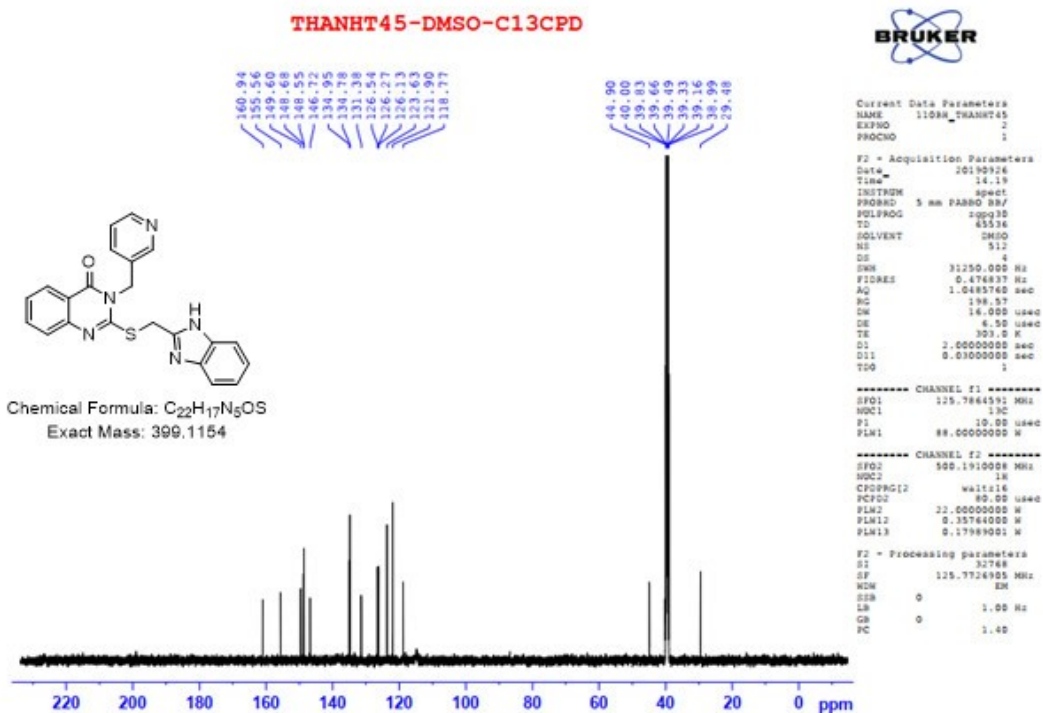

Figure S39.  $^{13}\text{C}$ -NMR spectrum of compound **9a**

March 26, 2020 6:16

## Report Details

Report Location C:\Users\Administrator\Desktop\TTPT\26032  
 0\Thanh T50  
 Report Creator Analyst  
 Report Date March 26, 2020 6:16

## Sample Details

Filename C:\Users\Administrator\Desktop\TTPT\2603  
 20\Thanh T50.sp  
 Creation Date 3/26/2020 3:38:29 PM  
 Analyst Analyst  
 X-Axis Units cm-1  
 X-Axis start value 4000  
 X-Axis end value 400  
 Data interval -1  
 Number of points 3601  
 Y-Axis Units %T  
 Description Sample 285 By Analyst Date Thursday,  
 March 26 2020  
 Pathlength (mm) 1

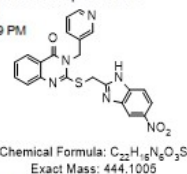

## Spectrum

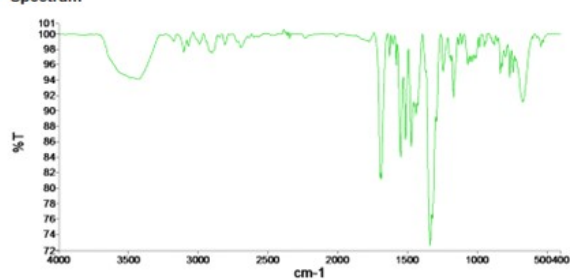

Figure S40. MS spectrum of compound 9b

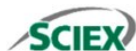

Created with SCIEX OS 1.2

CENTER FOR RESEARCH AND TECHNOLOGY TRANSFER  
 PHARMACEUTICAL CHEMISTRY LABORATORY  
 01, Mac Dinh Chi St., Dist 1, Ho Chi Minh City, Vietnam. Phone: (84) 907 070 939

## ANALYSIS REPORT

## Injection details

|                  |                       |                    |              |
|------------------|-----------------------|--------------------|--------------|
| Sample name      | THANH T50             | Vial position      | 12           |
| Sample file name | SER_wif2 - HUE        | Inject volume      | 5.00         |
| Acquisition date | 05/02/2020 1:21:14 PM | Acquisition method | ESI_POS_SCAN |
| Operator         | CB21261708            | Instrument name    | X500r QTOF   |

## Full mass spectrum

Spectrum from THANH T50\_1(ESI\_wif2 (sample 1) - THANH T50\_1(ESI\_+TOF MS (50 - 1500) from 0.139 min, noise filtered (noise multiplier = 1.5), Gaussian smoothed (0.5 points)

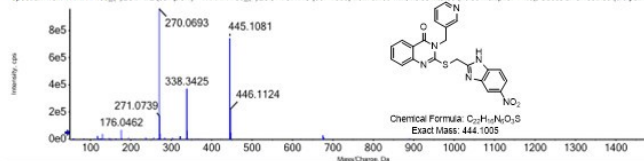

## Expanded spectrum

Spectrum from THANH T50\_1(ESI\_wif2 (sample 1) - THANH T50\_1(ESI\_+TOF MS (50 - 1500) from 0.139 min, noise filtered (noise multiplier = 1.5), Gaussian smoothed (0.5 points)

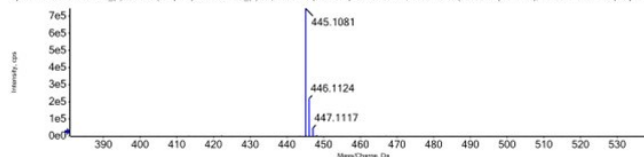

Figure S41. MS spectrum of compound 9b

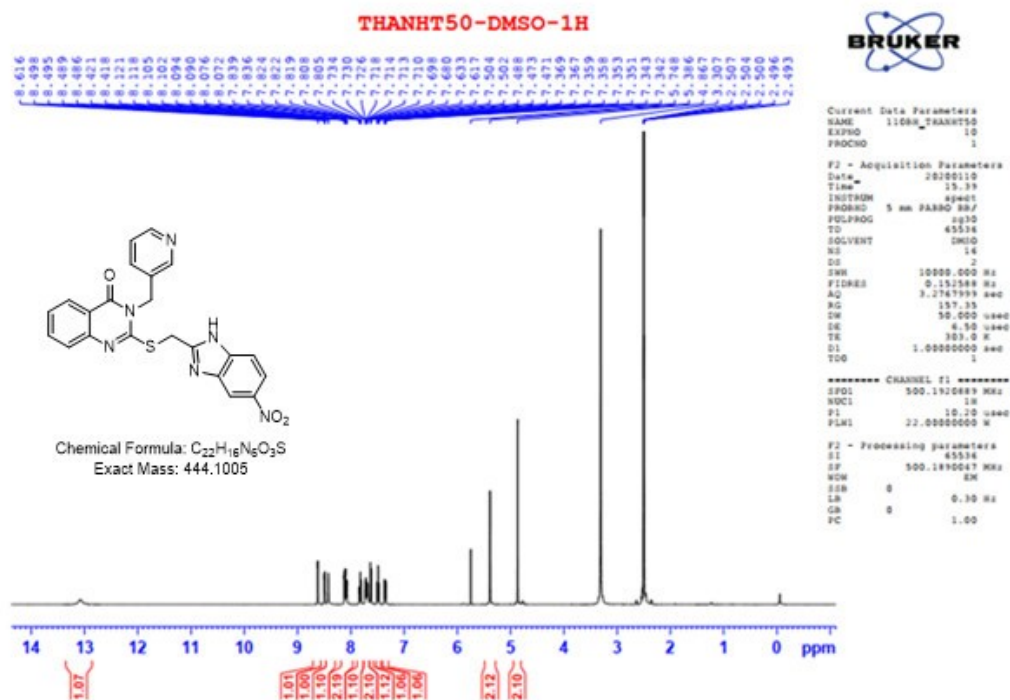

Figure S42. <sup>1</sup>H-NMR spectrum of compound **9b**

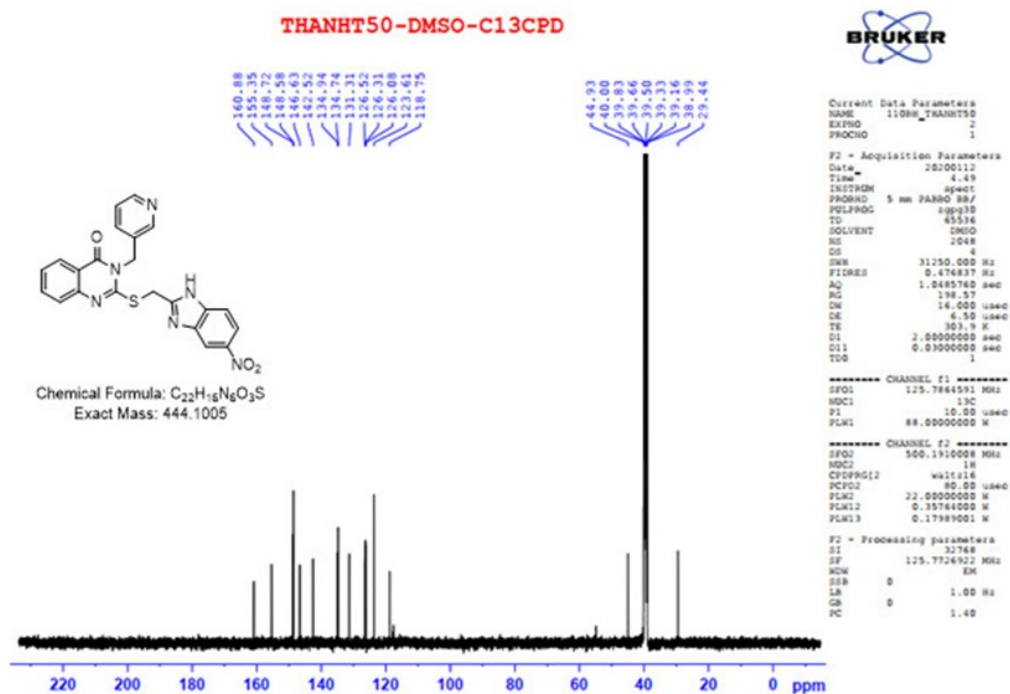

Figure S43. <sup>13</sup>C-NMR spectrum of compound **9b**



March 26, 2020 6:05

## Report Details

Report Location C:\Users\Administrator\Desktop\TTPT\26032  
 O\Thanh 67  
 Report Creator Analyst  
 Report Date March 26, 2020 6:05

## Sample Details

Filename C:\Users\Administrator\Desktop\TTPT\2603  
 20\Thanh 67.sp  
 Creation Date 3/26/2020 3:59:40 PM  
 Analyst Analyst  
 X-Axis Units cm-1  
 X-Axis start value 4000  
 X-Axis end value 400  
 Data interval -1  
 Number of points 3601  
 Y-Axis Units %T  
 Description Sample 288 By Analyst Date Thursday,  
 March 26 2020  
 Pathlength (mm) 1

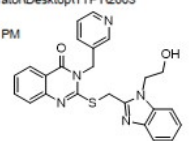

Chemical Formula:  $C_{24}H_{21}N_5O_2S$   
 Exact Mass: 443.1416

## Spectrum

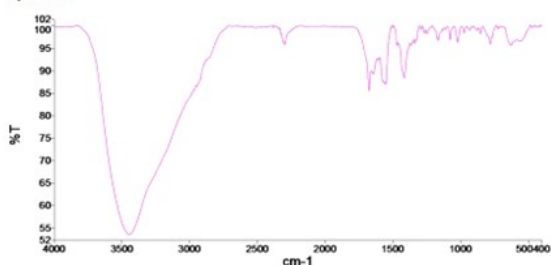

Figure S44. IR spectrum of compound 9c

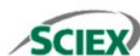

Created with SCIEX OS 1.2

CENTER FOR RESEARCH AND TECHNOLOGY TRANSFER  
 PHARMACEUTICAL CHEMISTRY LABORATORY  
 01, Mac Dinh Chi St., Dist 1, Ho Chi Minh City, Vietnam. Phone: (84) 907 070 939

## ANALYSIS REPORT

## Injection details

|                  |                       |                    |              |
|------------------|-----------------------|--------------------|--------------|
| Sample name      | THANH T67             | Vial position      | 17           |
| Sample file name | SER. wif2 - HUE       | Inject volume      | 5.00         |
| Acquisition date | 05/02/2020 1:31:14 PM | Acquisition method | ESI_POS_SCAN |
| Operator         | CB21261708            | Instrument name    | X500R QTOF   |

## Full mass spectrum

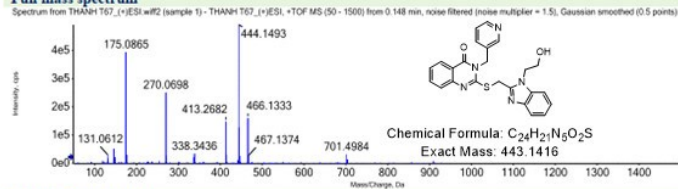

## Expanded spectrum

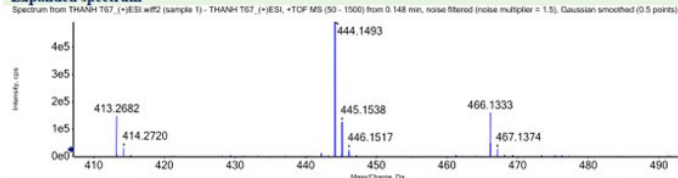

Figure S45. MS spectrum of compound 9c

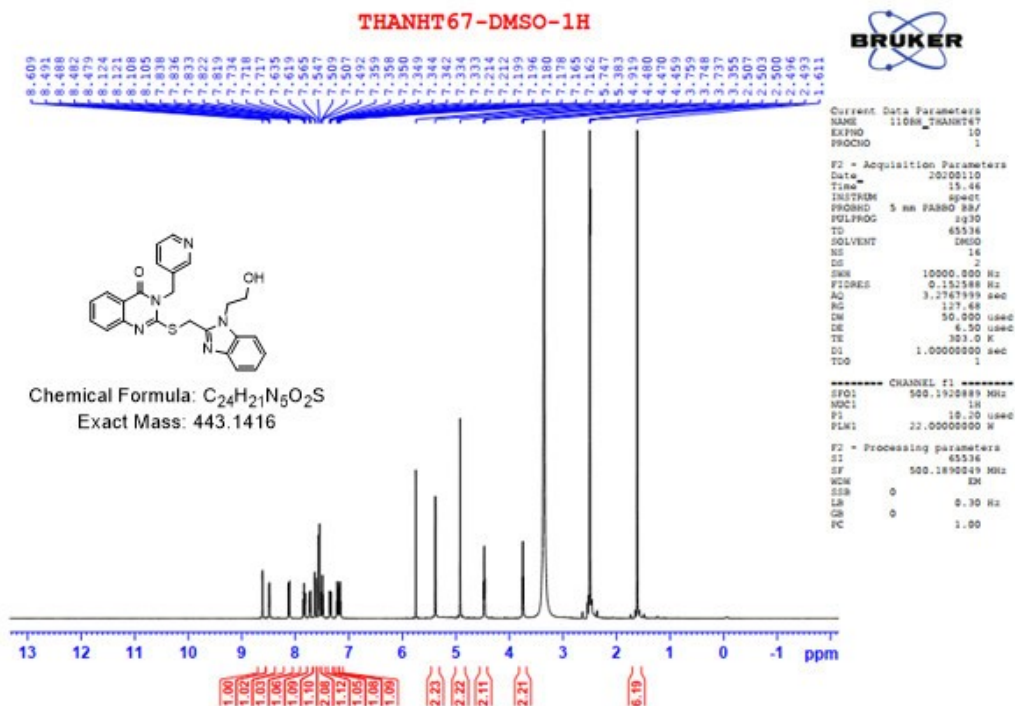

9

Figure S46. <sup>1</sup>H-NMR spectrum of compound 9c

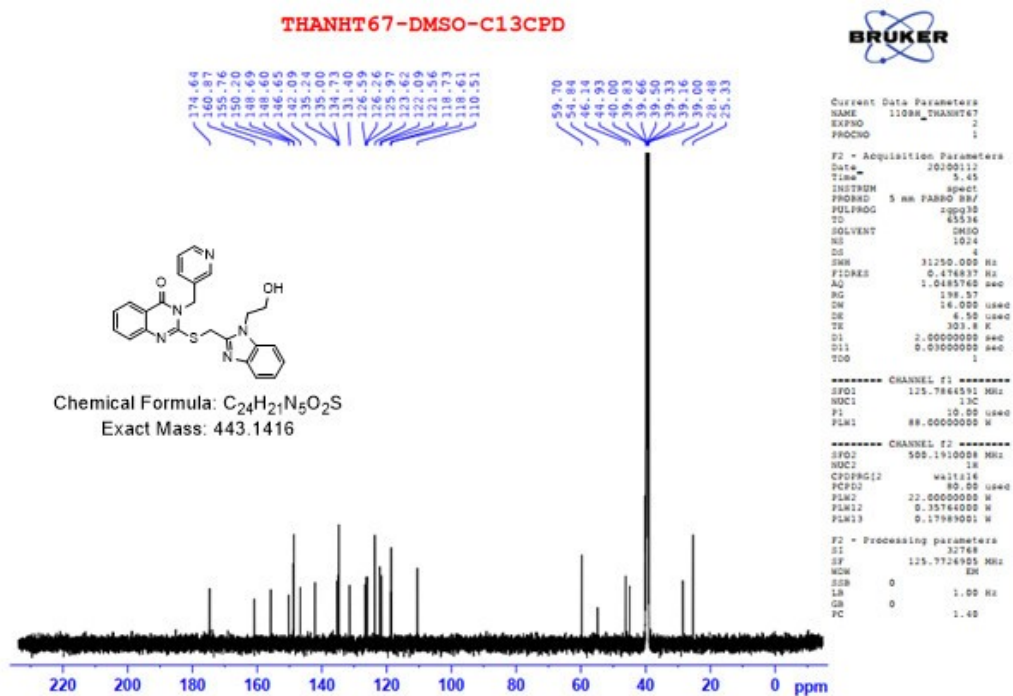

Figure S47. <sup>13</sup>C-NMR spectrum of compound 9c



### **S3. Molecular Cloning and Protein Expression of M<sup>pro</sup>**

The SARS-CoV-2 M<sup>pro</sup> gene was obtained from Addgene and cloned into the pGEX-5X vector, which has a glutathione S-transferase (GST) tag attached to the N-terminus of the recombinant M<sup>pro</sup> protein as previously described.<sup>30</sup> After the recombinant plasmid was transformed into *E. coli* BL21 (DE3) competent cells, isopropyl thio- $\beta$ -D-thiogalactopyranoside (IPTG) (0.5 mM) was added to induce recombinant M<sup>pro</sup> protein expression for 10 hours at 16°C and 180 rpm. The expressed proteins were purified using Glutathione Sepharose 4 Fast Flow resin, followed by cleavage with Factor Xa and analysis of protein purity by SDS-PAGE. The protein appears as a homogeneous band on SDS-PAGE. Protein concentration was determined by Bradford assay, aliquoted into vials, and stored at -80°C until use. To confirm enzyme activity and stability, GC376 (a preclinical cysteine protease inhibitor that binds to M<sup>pro</sup> of feline coronavirus (FCoV)) was used as a positive control in each experiment to verify the activity of the enzyme in that assay.<sup>37,38</sup> Purified proteins are stable at -80°C for at least six months.

### **S4. In vitro inhibitory activity assay of 3CL protease**

Protease activity assays were performed in a 384-well black flat-bottomed microtiter plate (Thermo Scientific™ Nunc™). In a final volume of 25  $\mu$ L, the recombinant SARS-CoV-2 3CL protease was added at a final concentration of 50 nM and mixed with different concentrations of compounds in assay buffer (final concentration: 20 mM Tris pH 7.3, 100 mM NaCl, 1% DTT, 1% EDTA, 1% DMSO) and pre-incubated at 37°C for 30 min. The FRET substrate, DABCYL-KTSAVLQSGFRKME-EDANS, was then added to a final concentration of 50  $\mu$ M. The completed reaction was incubated at 37 °C for 1 h. First, the activity of the purified recombinant protein was tested against the positive control substrate GC-376 and an IC<sub>50</sub> similar to that reported in the literature to confirm that the activity of the enzyme was close to that reported in the literature.<sup>37,38</sup> This enzyme activity was assumed to be 100% for subsequent calculation of inhibitory activity. Blank wells contain the same compound concentration as substrate but without 3CL protease. Inhibition rates were then calculated by comparison with control wells without added inhibitor. The fluorescence signal (excitation/emission, 355 nm/460 nm) of released EDANS was measured using a fluorometer (Fluoroskan Ascent FL). IC<sub>50</sub> values were determined by nonlinear regression (GraphPad Prism 8.0.1).

## S5. Theoretical studies

**Table S1:** Molecular descriptor and drug-likeness calculation of compound **9b**

| <b>Parameter</b>                            | <b>Value</b>                      |
|---------------------------------------------|-----------------------------------|
| Molecular weight (g/mol)                    | 444.47                            |
| HBA                                         | 6                                 |
| HBD                                         | 1                                 |
| RP                                          | 6                                 |
| TPSA (Å <sup>2</sup> )                      | 147.58                            |
| Molar refractivity                          | 124.23                            |
| Solubility (mg/mL)                          | 7.46e-03 (moderately soluble)     |
| Lipinski's rule                             | Yes                               |
| Veber's rule                                | No (TPSA > 140 Å <sup>2</sup> )   |
| Egan's rule                                 | No (TPSA > 131.6 Å <sup>2</sup> ) |
| Ghose's rule                                | Yes                               |
| Muegge's rule                               | Yes                               |
| GI absorption                               | Low                               |
| BBB permeant                                | No                                |
| P-gp substrate                              | No                                |
| Log K <sub>p</sub> (skin permeation) (cm/s) | -6.76                             |
| Bioavailability score                       | 0.55                              |

HBA: hydrogen bond acceptor, HBD: hydrogen bond donor, RB: rotatable bonds, TPSA: topological polar surface area, BBB: blood-brain barrier, GI: gastrointestinal
